# Supplementary material for: Synthesis and Antifungal Activity of Novel Myrtenal-Based 4-Methyl-1,2,4-triazole-thioethers
Source: PubMed Central journal article supplement (PMC6155697; doi:10.3390/molecules22020193), 2017-01-24
Supplement: molecules-22-00193-s001.pdf [file molecules-22-00193-s001.pdf]

# Supplementary Materials: Synthesis and Antifungal Activity of Novel Myrtenal-Based 4-Methyl-1,2,4-triazole-thioethers

Gui-Shan Lin, Wen-Gui Duan, Lin-Xiao Yang, Min Huang and Fu-Hou Lei

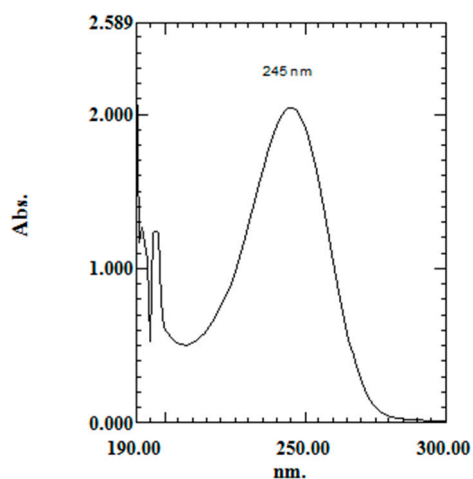

Figure S1. UV-vis spectrum of myrtenal (2) in EtOH.

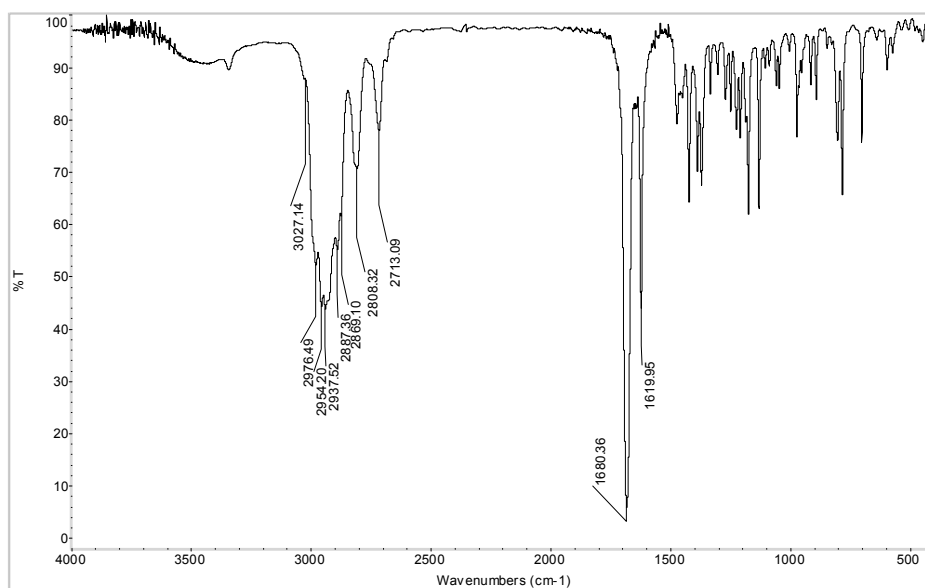

Figure S2. FTIR spectrum of myrtenal (2).

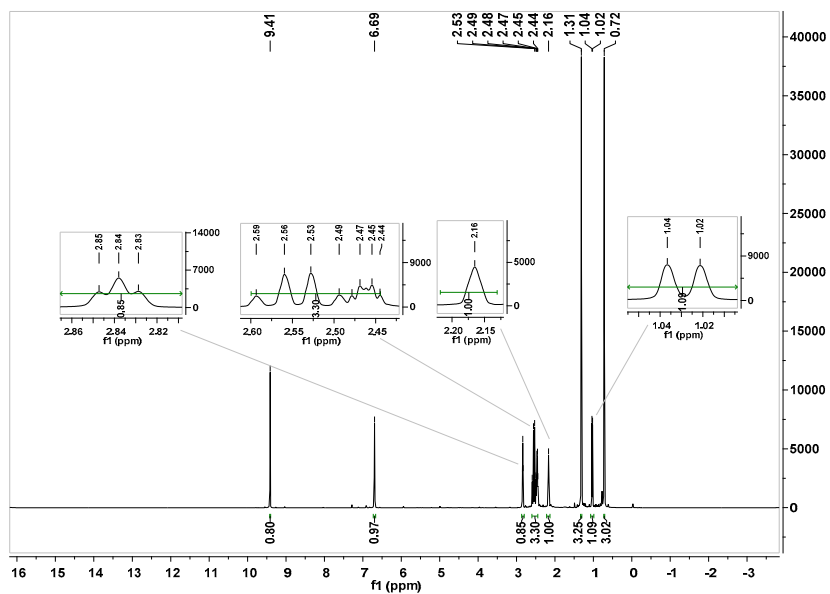

**Figure S3.**  $^1\text{H-NMR}$  spectrum of myrtenal (2) in  $\text{CDCl}_3$ .

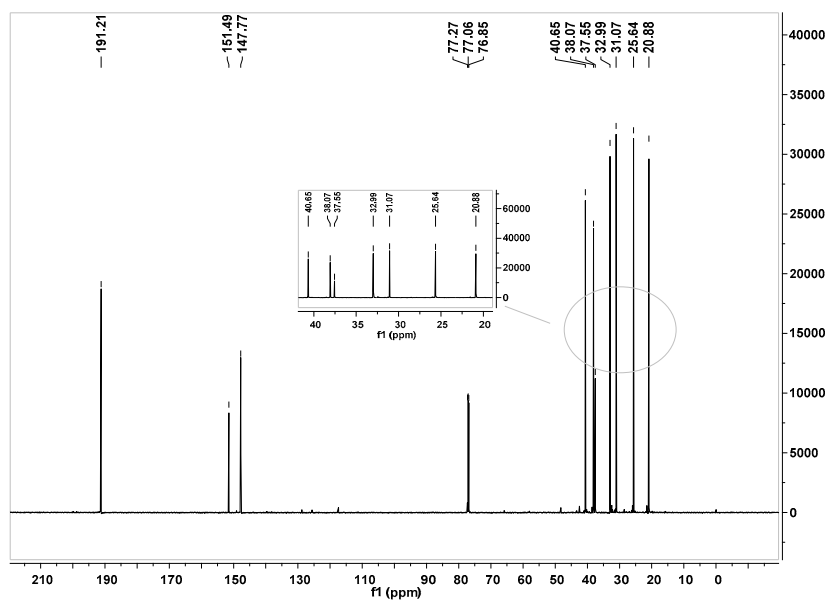

**Figure S4.**  $^{13}\text{C-NMR}$  spectrum of myrtenal (2) in  $\text{CDCl}_3$ .

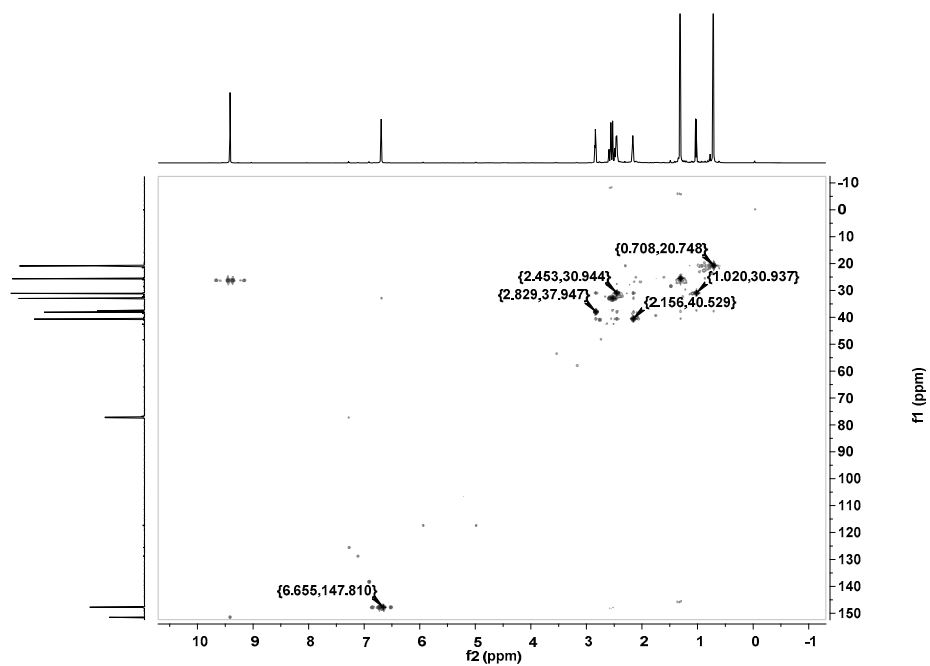

Figure S5a. HMQC spectrum of myrtenal (2) in CDCl<sub>3</sub>.

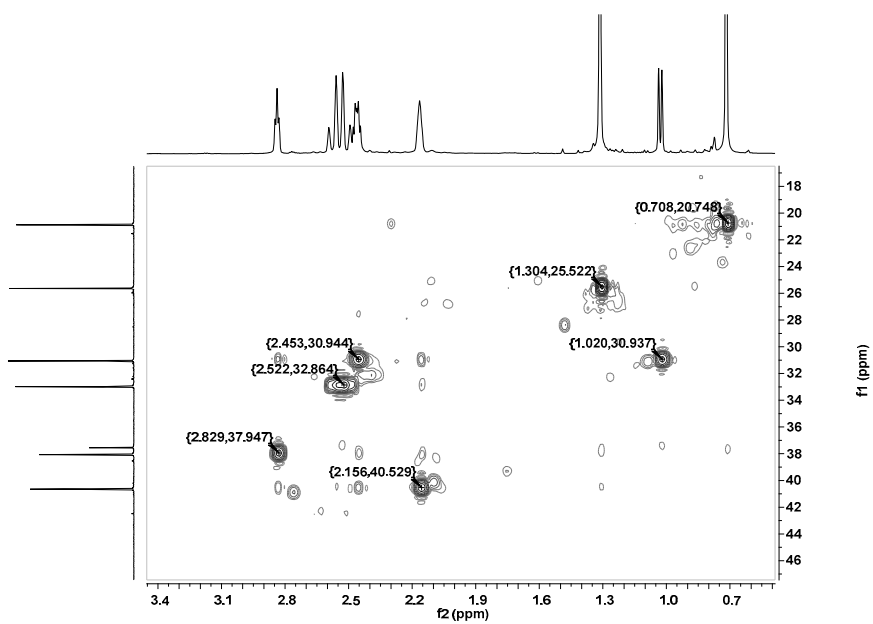

Figure S5b. Expanded HMQC spectrum of myrtenal (2) in CDCl<sub>3</sub>.

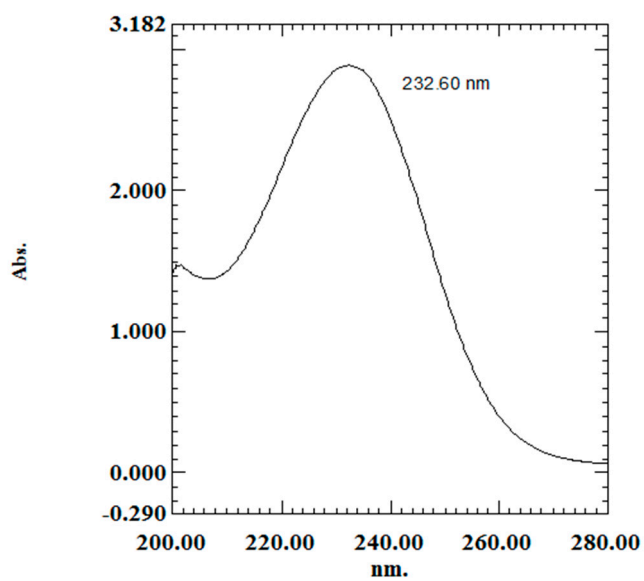

Figure S6. UV-vis spectrum of myrtenic acid (3) in EtOH.

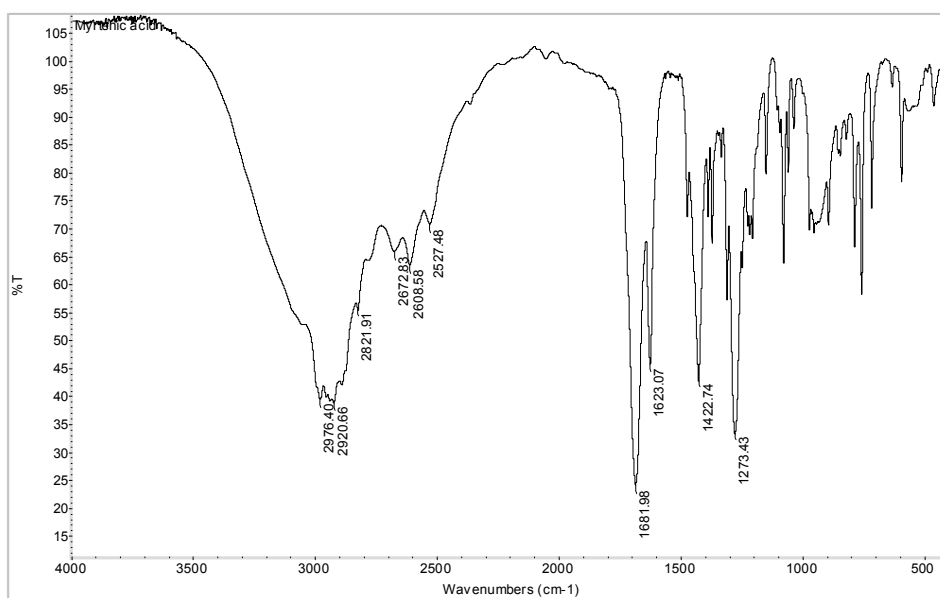

Figure S7. FTIR spectrum of myrtenic acid (3).

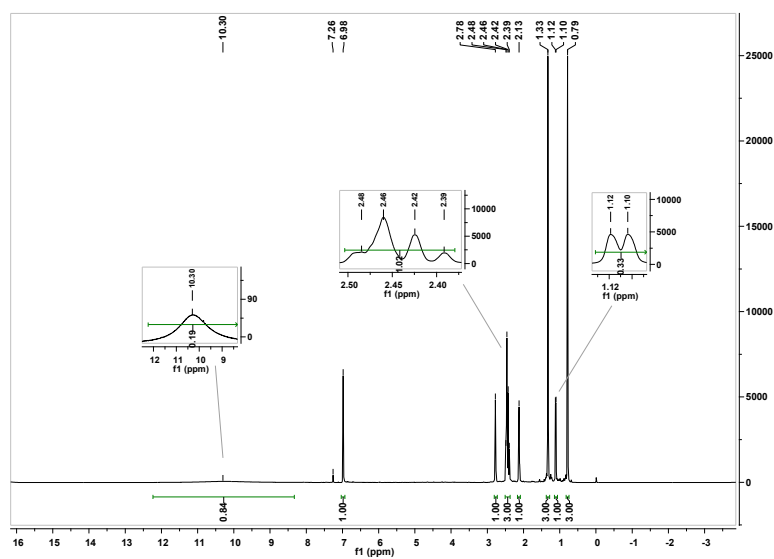Figure S8.  $^1\text{H}$ -NMR spectrum of myrtenic acid (3) in  $\text{CDCl}_3$ .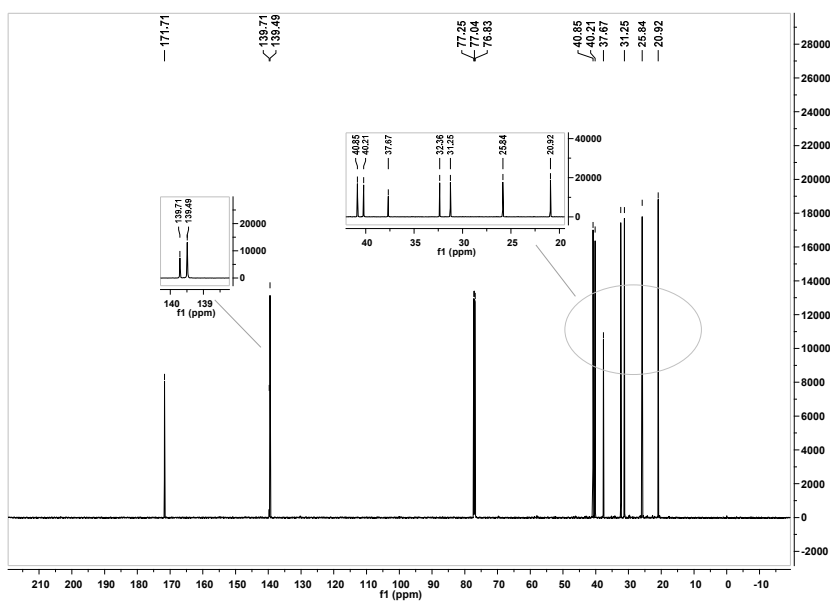Figure S9.  $^{13}\text{C}$ -NMR spectrum of myrtenic acid (3) in  $\text{CDCl}_3$ .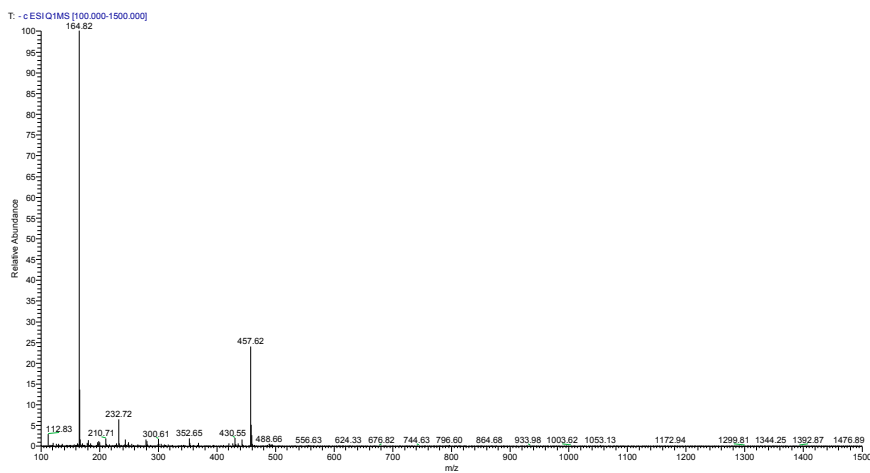

Figure S10. ESI-MS spectrum of myrtenic acid (3).

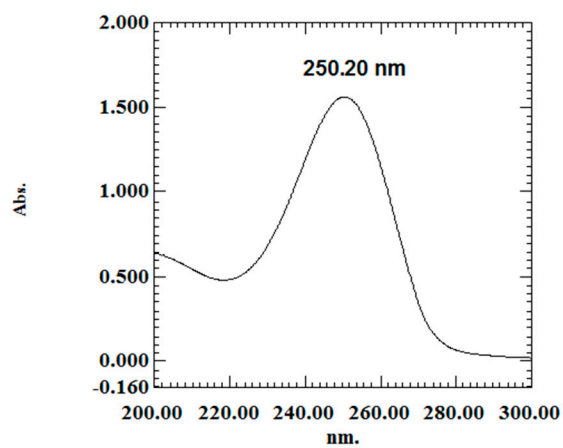

Figure S11. UV-vis spectrum of myrtenyl chloride (4) in cyclohexane.

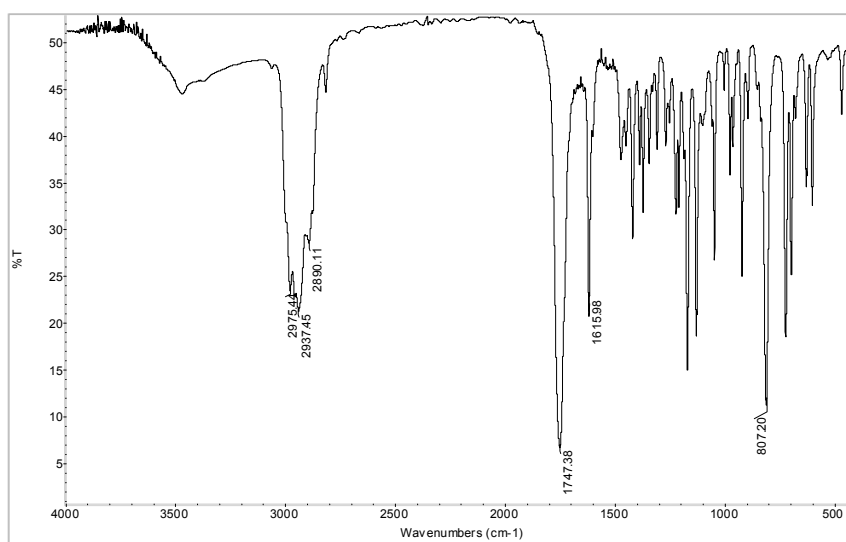

Figure S12. FTIR spectrum of myrtenyl chloride (4).

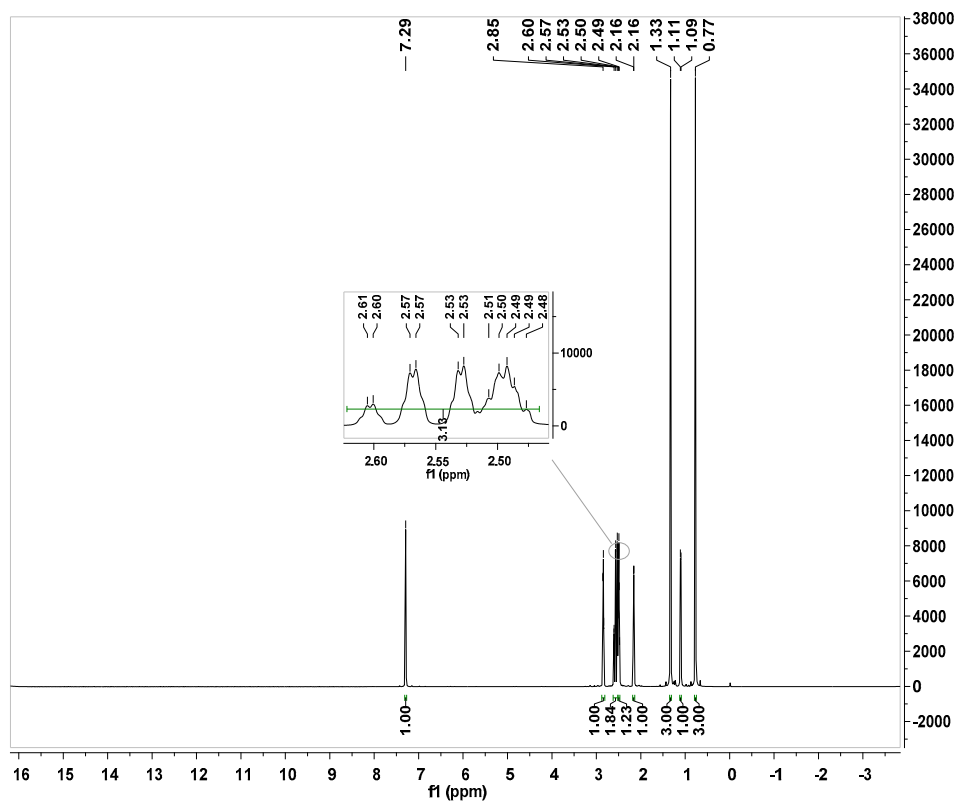Figure S13.  $^1\text{H}$ -NMR spectrum of myrtenyl chloride (4) in  $\text{CDCl}_3$ .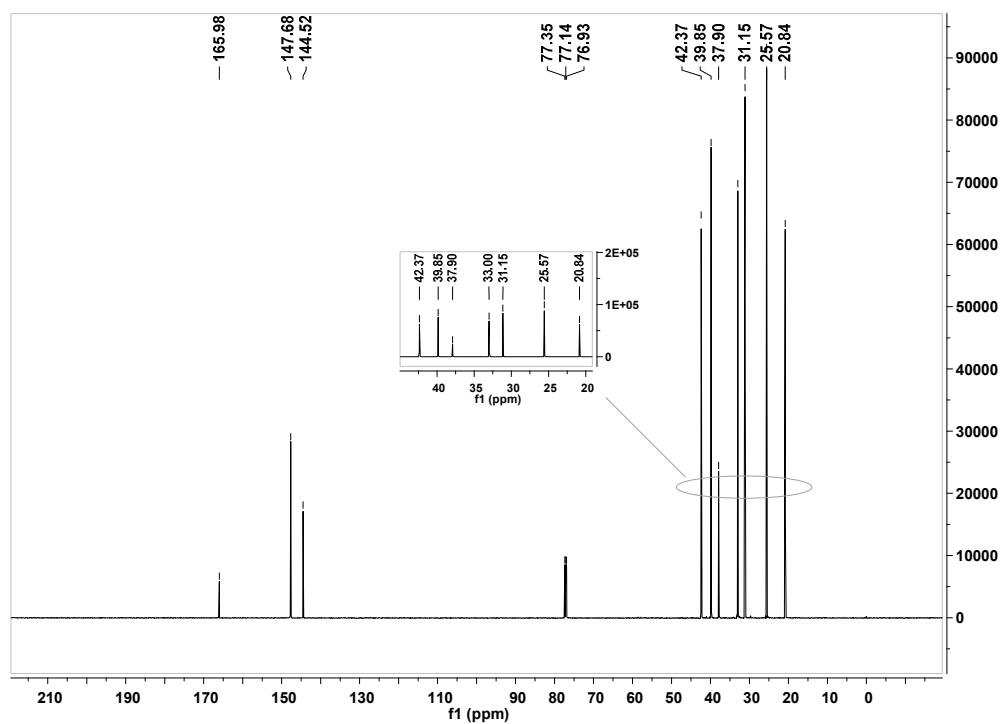Figure S14.  $^{13}\text{C}$ -NMR spectrum of myrtenyl chloride (4) in  $\text{CDCl}_3$ .

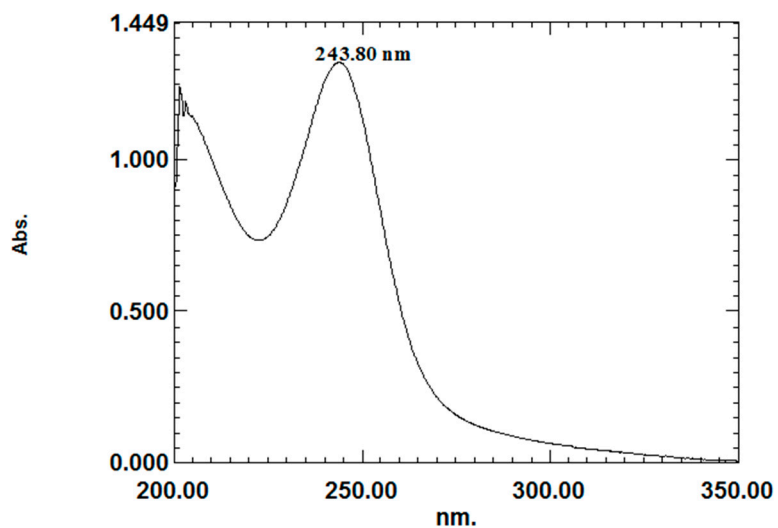

Figure S15. UV-vis spectrum of (5) in EtOH.

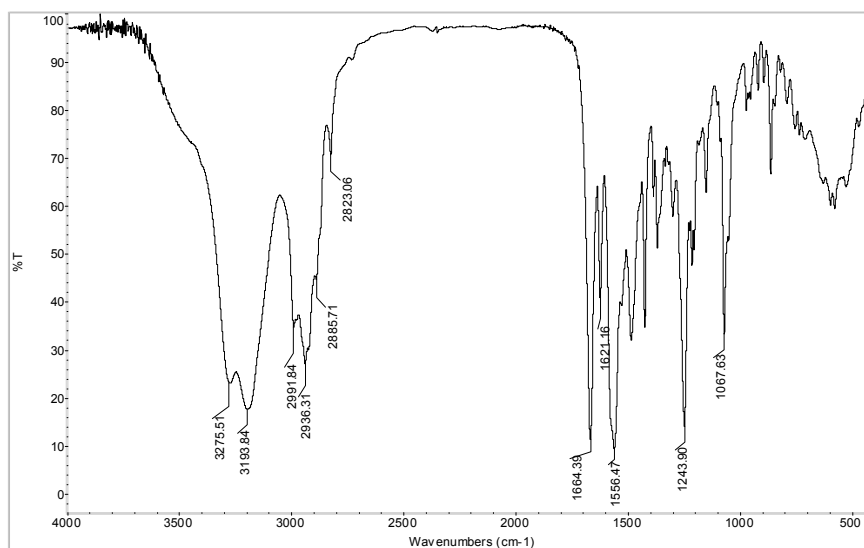

Figure S16. FTIR spectrum of 2-(myrtenoic carbonyl)-*N*-methylhydrazinecarbothioamide (5).



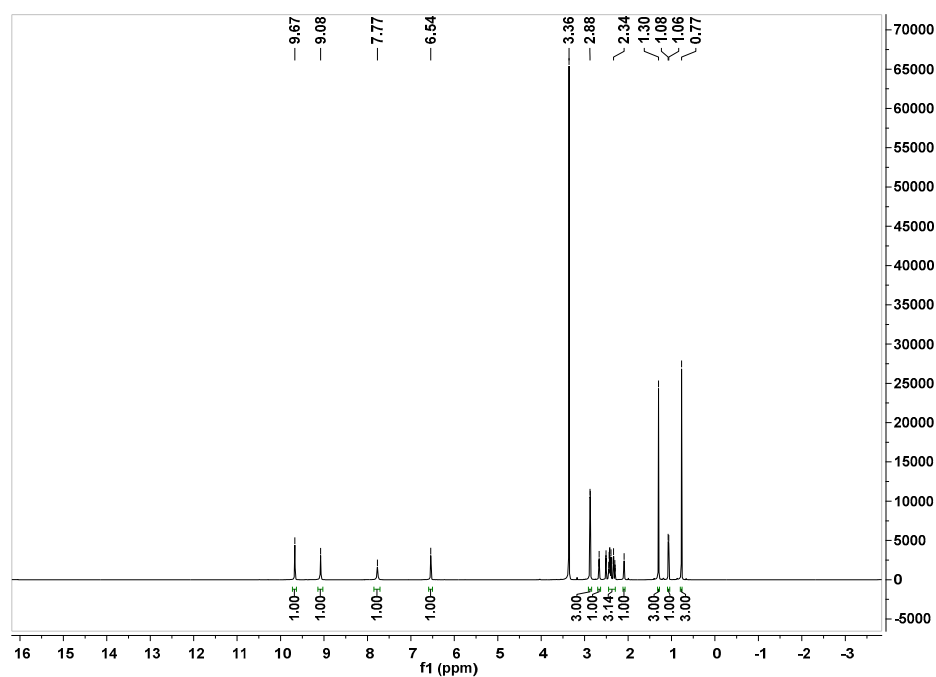

Figure S17.  $^1\text{H-NMR}$  2-(myrtenoic carbonyl)-*N*-methylhydrazinecarbothioamide (5) in  $\text{CDCl}_3$ .

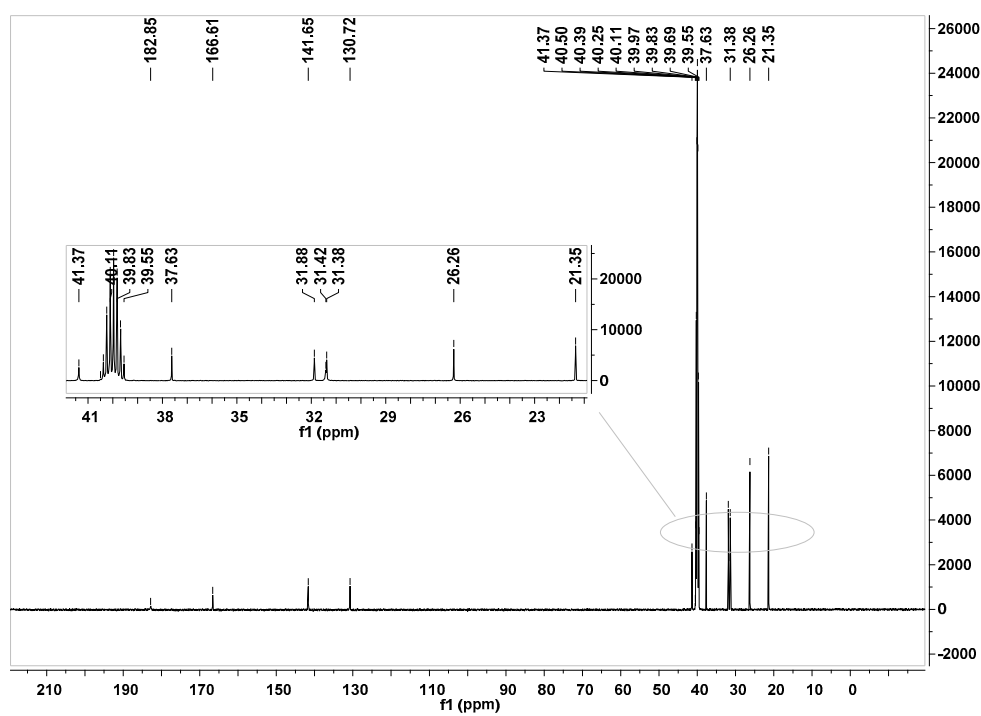

Figure S18.  $^{13}\text{C-NMR}$  spectrum of 2-(myrtenoic carbonyl)-*N*-methylhydrazinecarbothioamide (5) in  $\text{CDCl}_3$ .

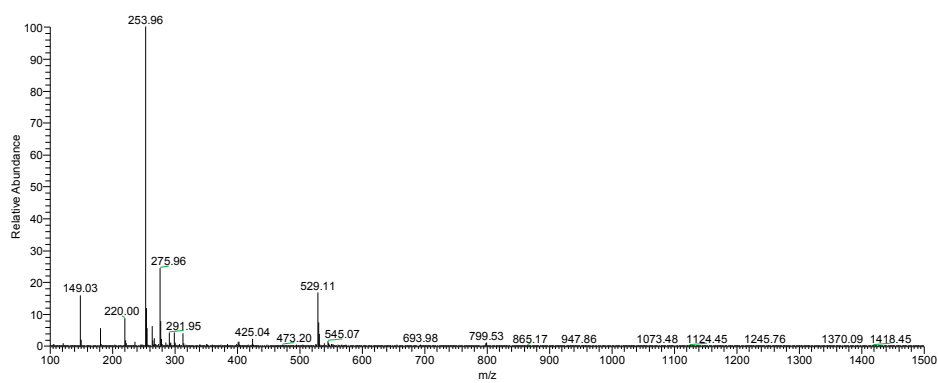

Figure S19. ESI-MS spectrum of (5).

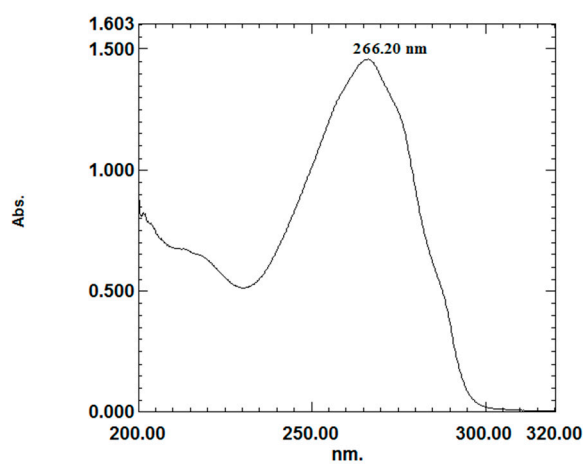

Figure S20. UV-vis spectrum of the target compound 6a in cyclohexane.

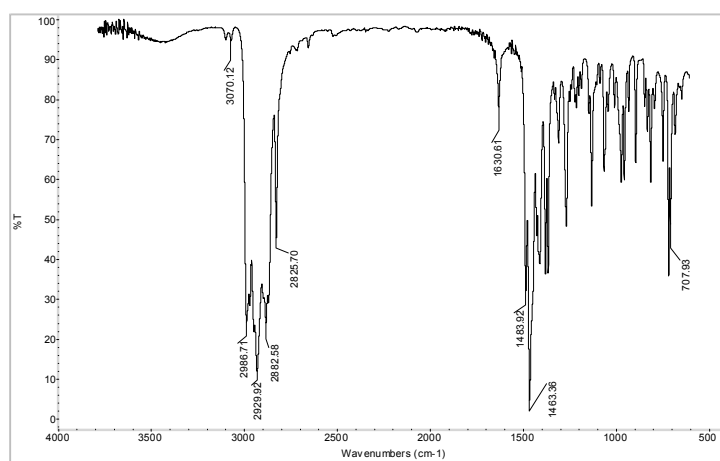

Figure S21. FTIR spectrum of the target compound 6a.

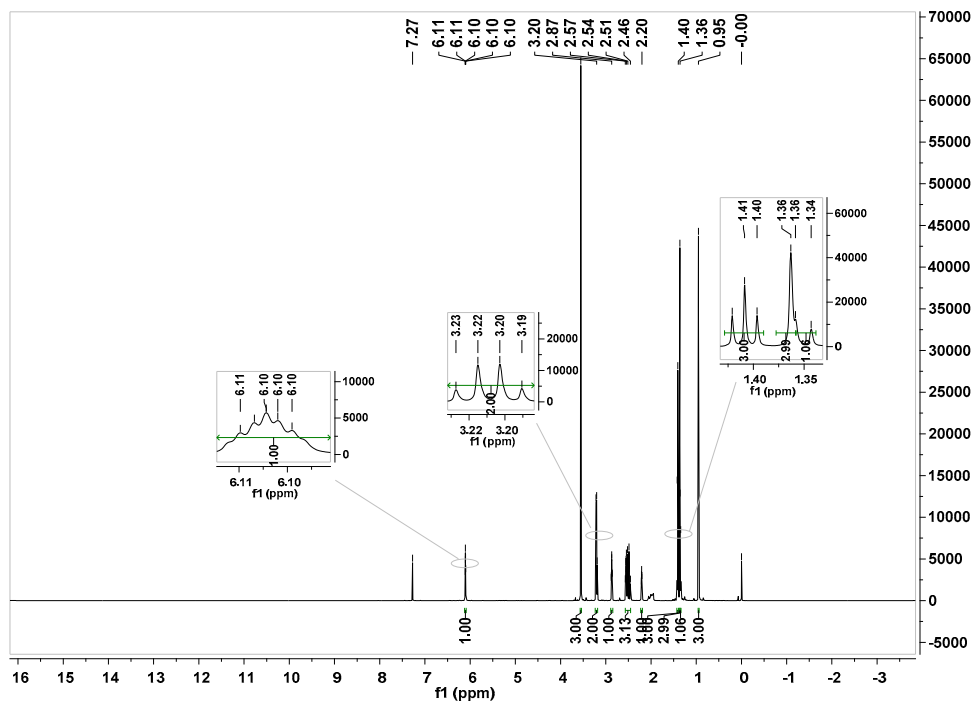Figure S22.  $^1\text{H}$ -NMR spectrum of the target compound **6a** in  $\text{CDCl}_3$ .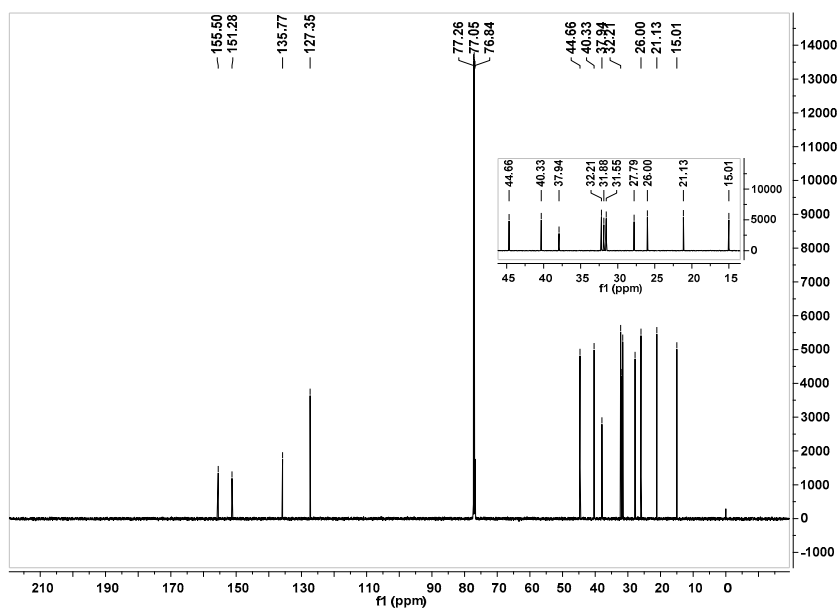Figure S23.  $^{13}\text{C}$ -NMR spectrum of the target compound **6a** in  $\text{CDCl}_3$ .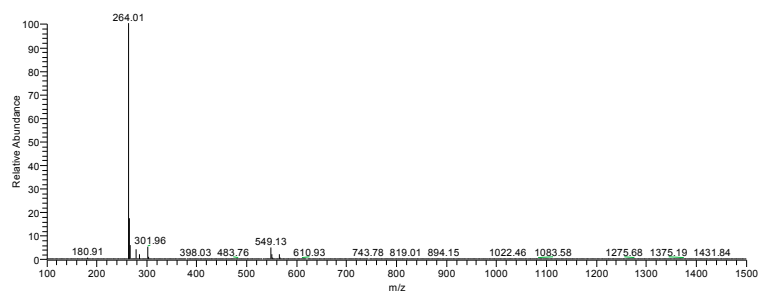

Figure S24. ESI-MS spectrum of the target compound 6a.

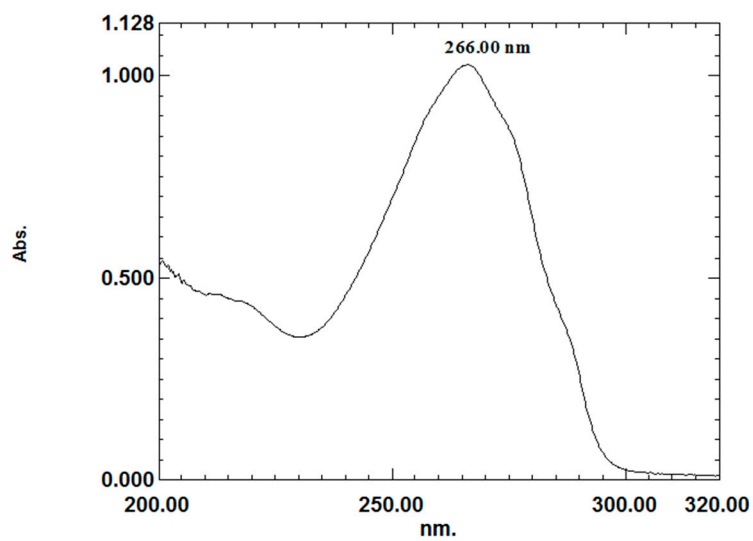

Figure S25. UV-vis spectrum of the target compound 6b in cyclohexane.

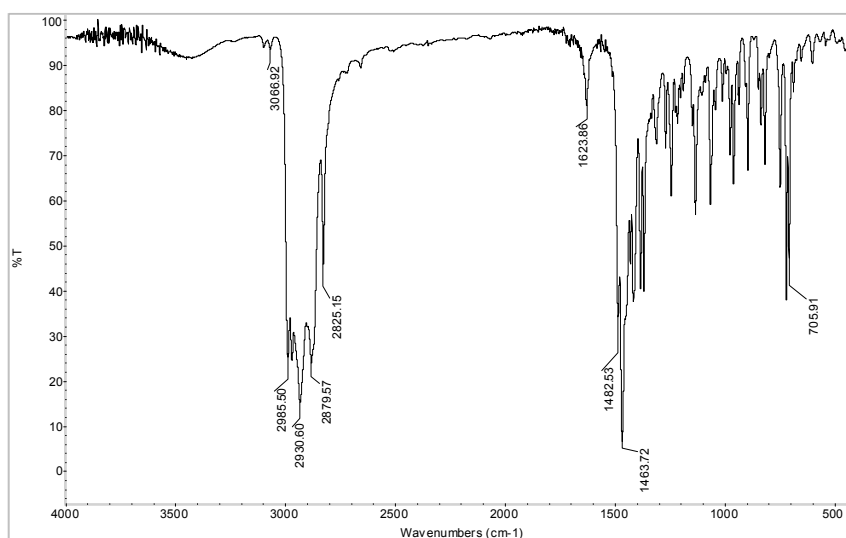

Figure S26. FTIR spectrum of the target compound 6b.

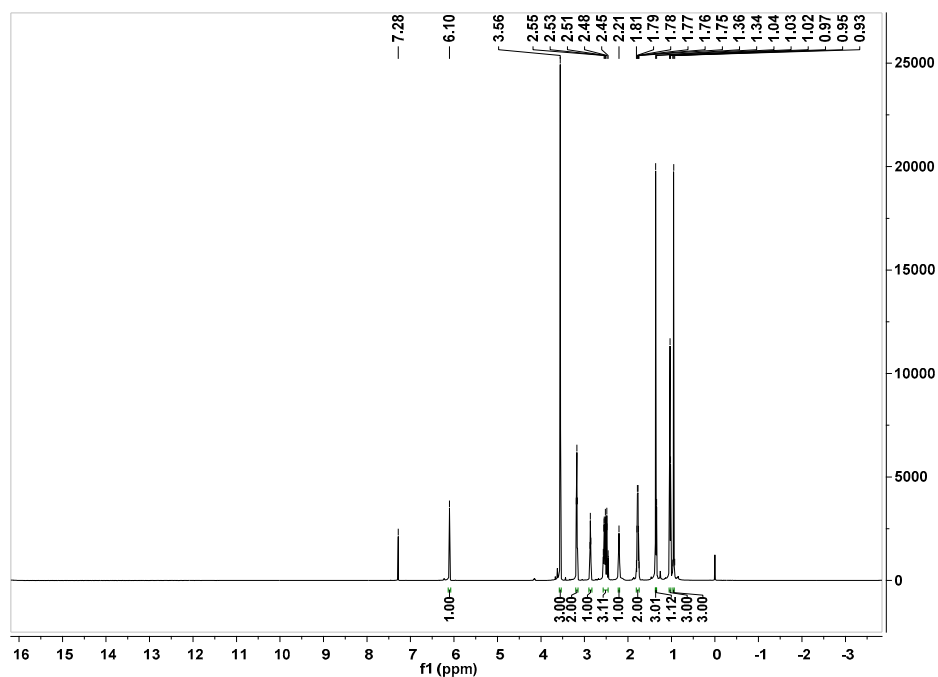Figure S27.  $^1\text{H-NMR}$  spectrum of the target compound **6b** in  $\text{CDCl}_3$ .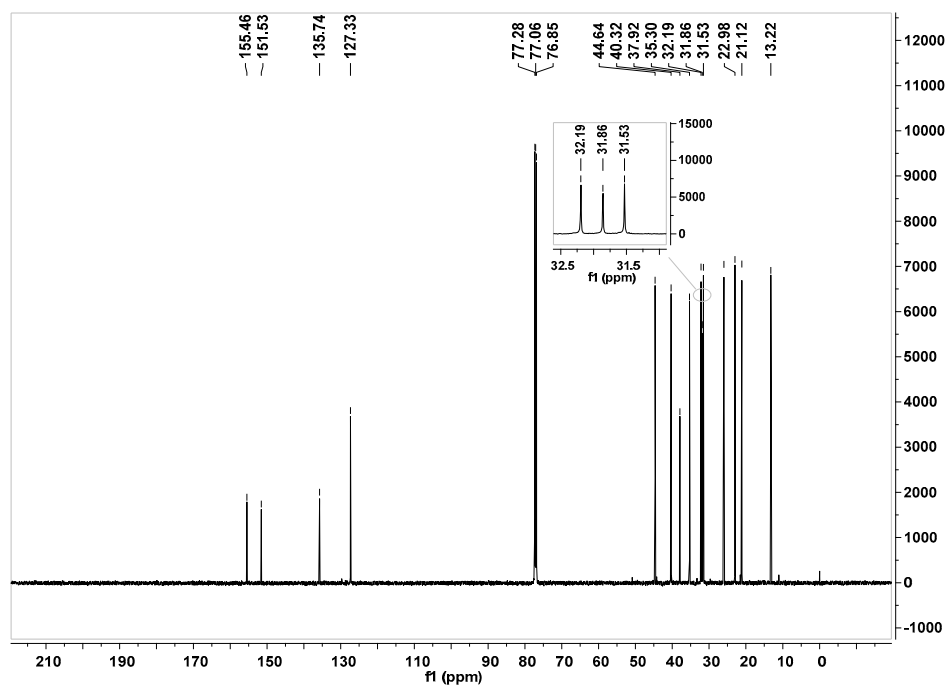Figure S28.  $^{13}\text{C-NMR}$  spectrum of the target compound **6b** in  $\text{CDCl}_3$ .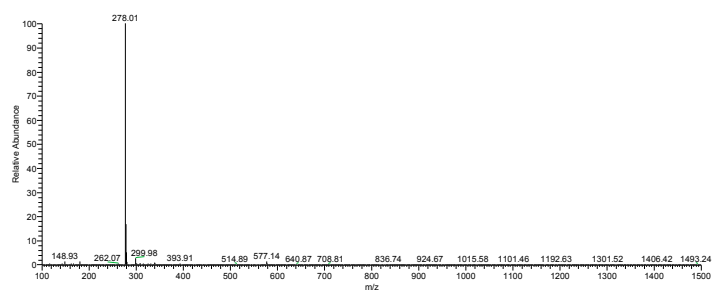

Figure S29. ESI-MS spectrum of the target compound 6b.

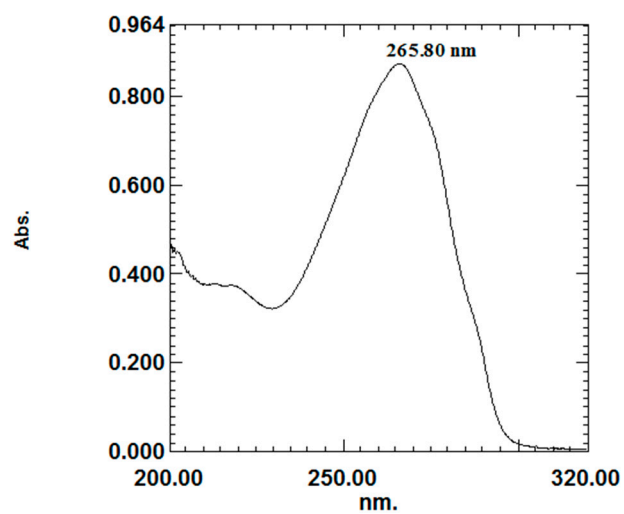

Figure S30. UV-vis spectrum of the target compound 6c in cyclohexane.

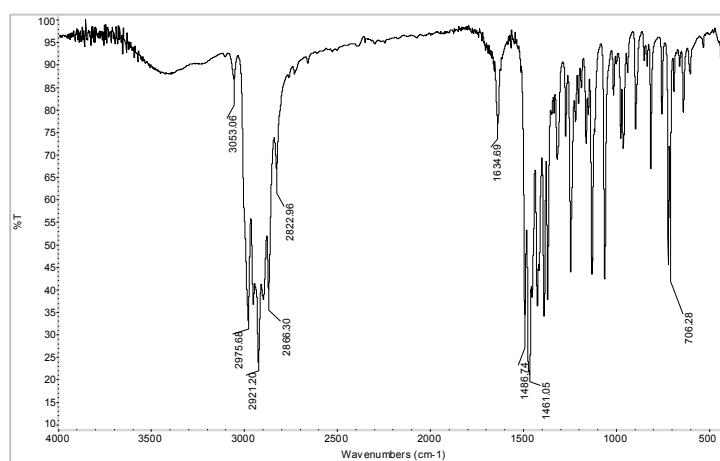

Figure S31. FTIR spectrum of the target compound 6c.

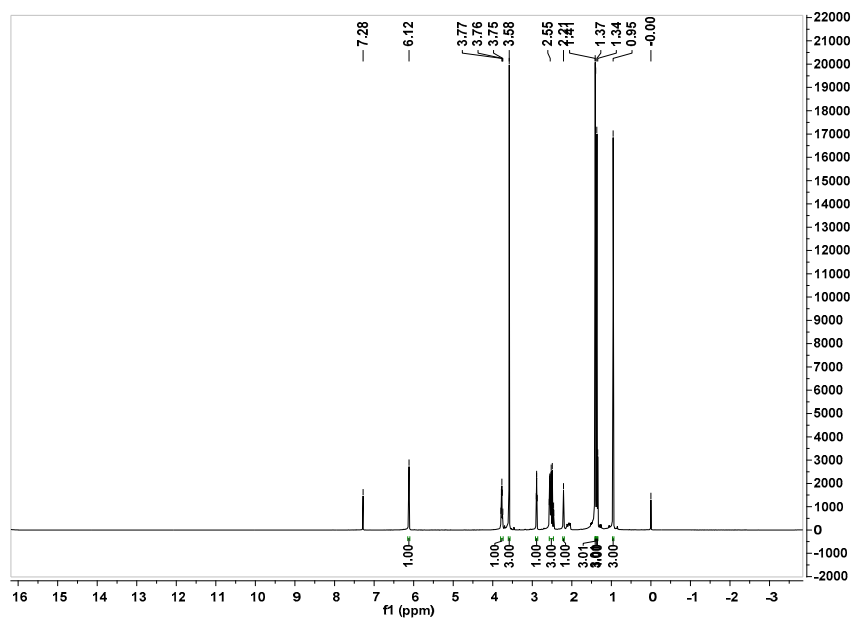

**Figure S32.**  $^1\text{H-NMR}$  spectrum of the target compound **6c** in  $\text{CDCl}_3$ .

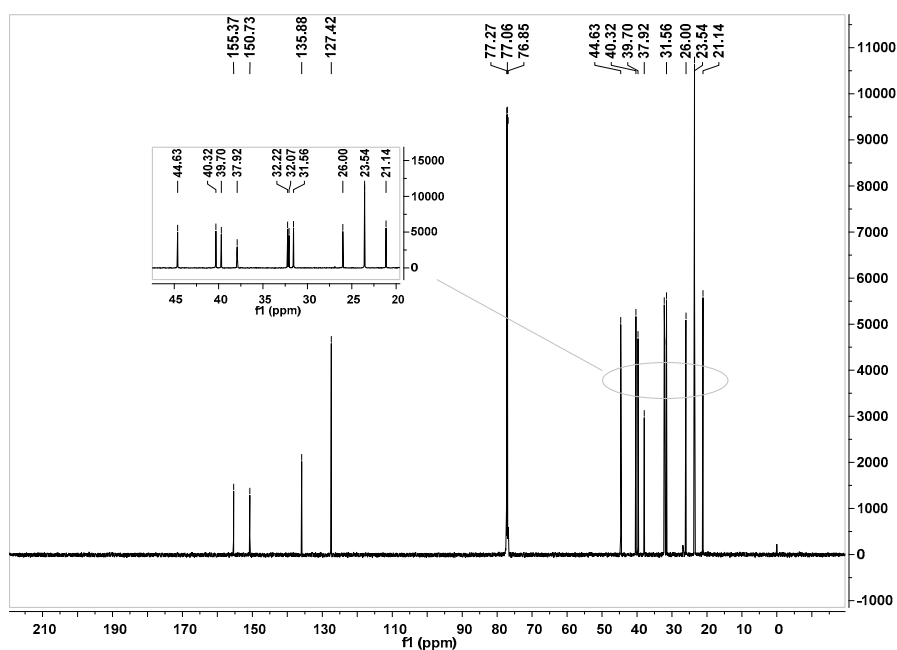

**Figure S33.**  $^{13}\text{C-NMR}$  spectrum of the target compound **6c** in  $\text{CDCl}_3$ .

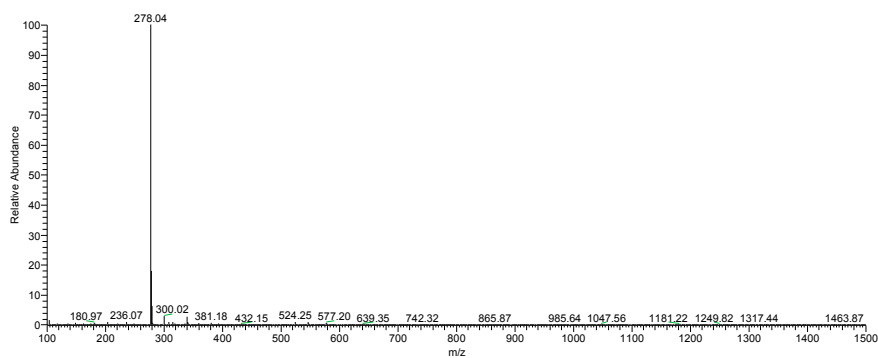

Figure S34. ESI-MS spectrum of the target compound 6c.

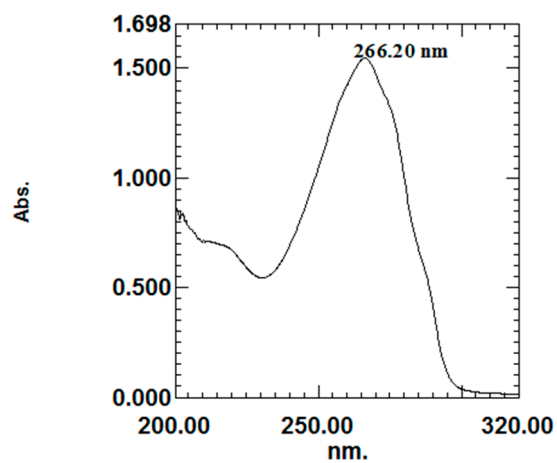

Figure S35. UV-vis spectrum of the target compound 6d in cyclohexane.

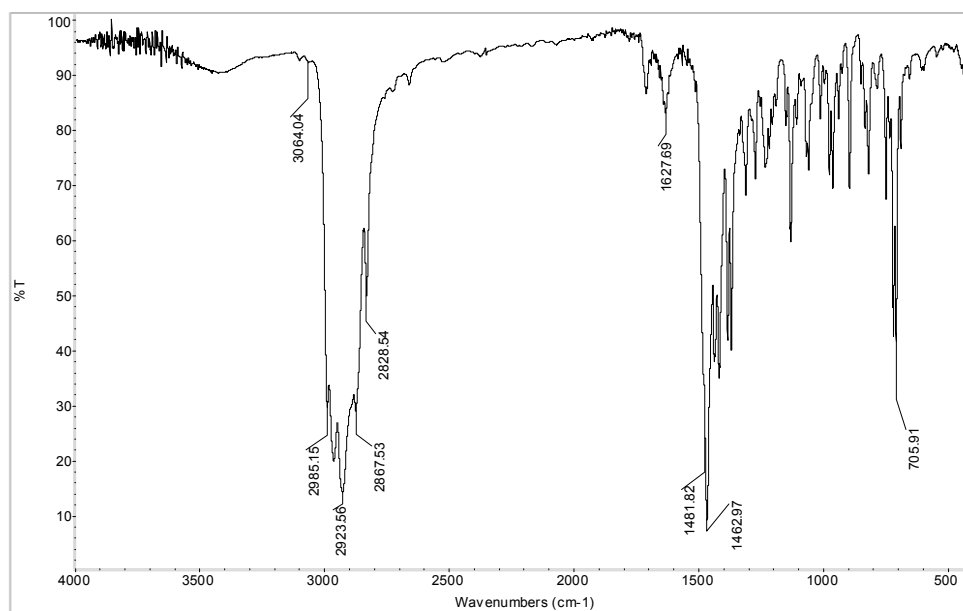

Figure S36. FTIR spectrum of the target compound 6d.



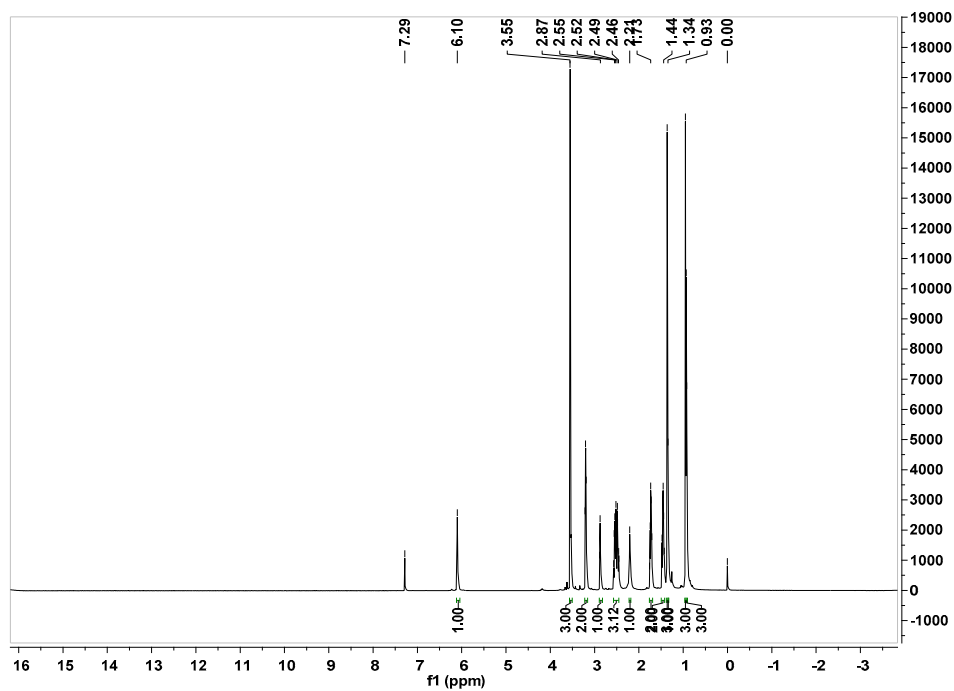Figure S37.  $^1\text{H-NMR}$  spectrum of the target compound **6d** in  $\text{CDCl}_3$ .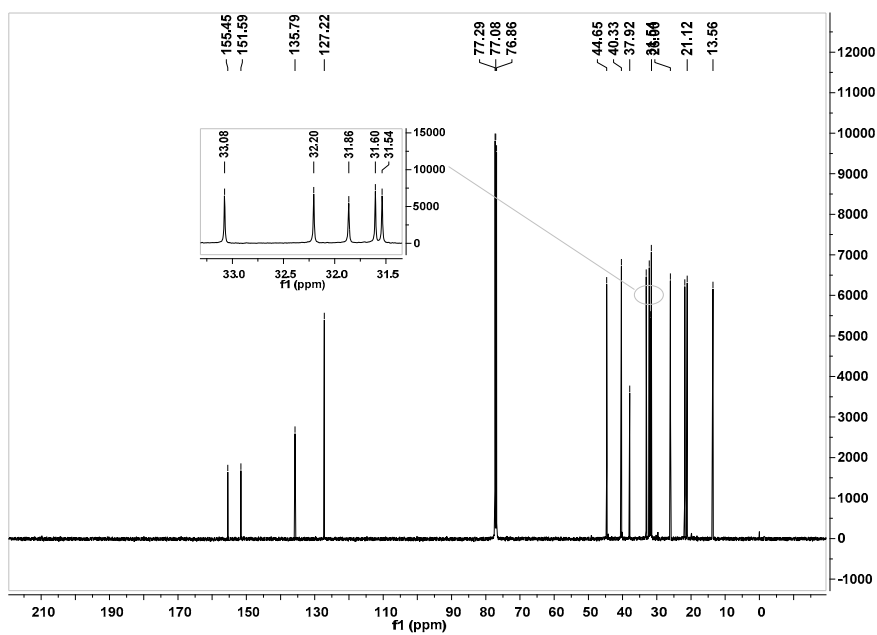Figure S38.  $^{13}\text{C-NMR}$  spectrum of the target compound **6d** in  $\text{CDCl}_3$ .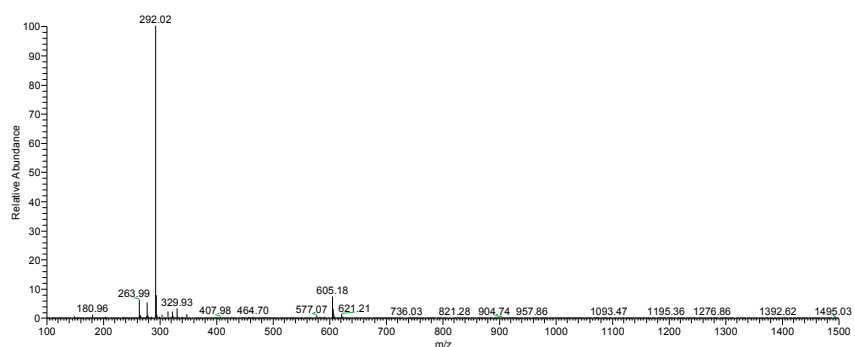

Figure S39. ESI-MS spectrum of the target compound 6d.

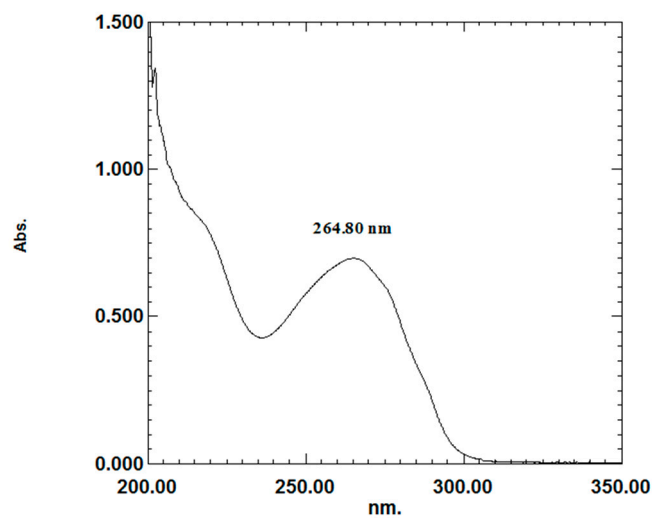

Figure S40. UV-vis spectrum of the target compound 6e in cyclohexane.

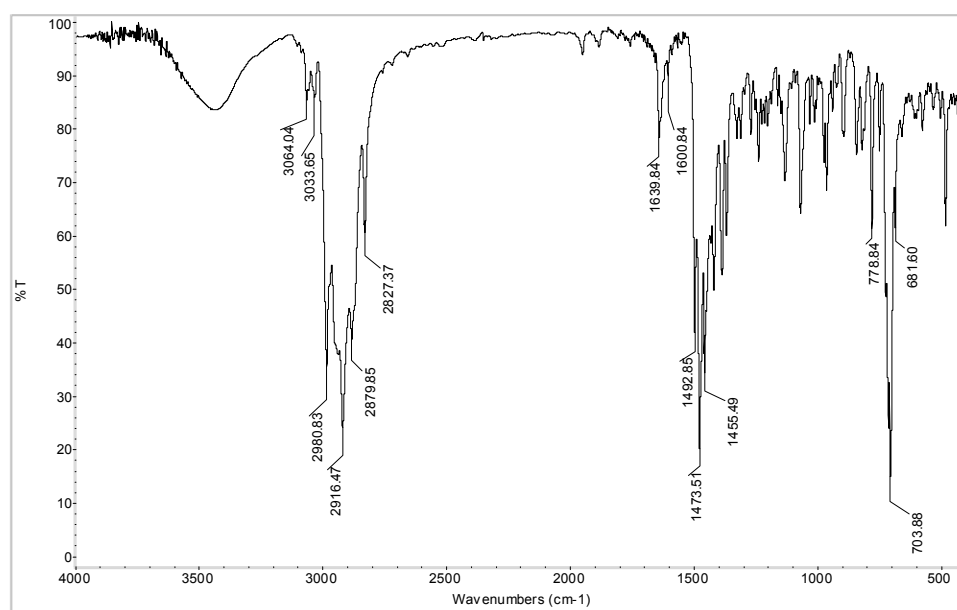

Figure S41. FTIR spectrum of the target compound 6e.

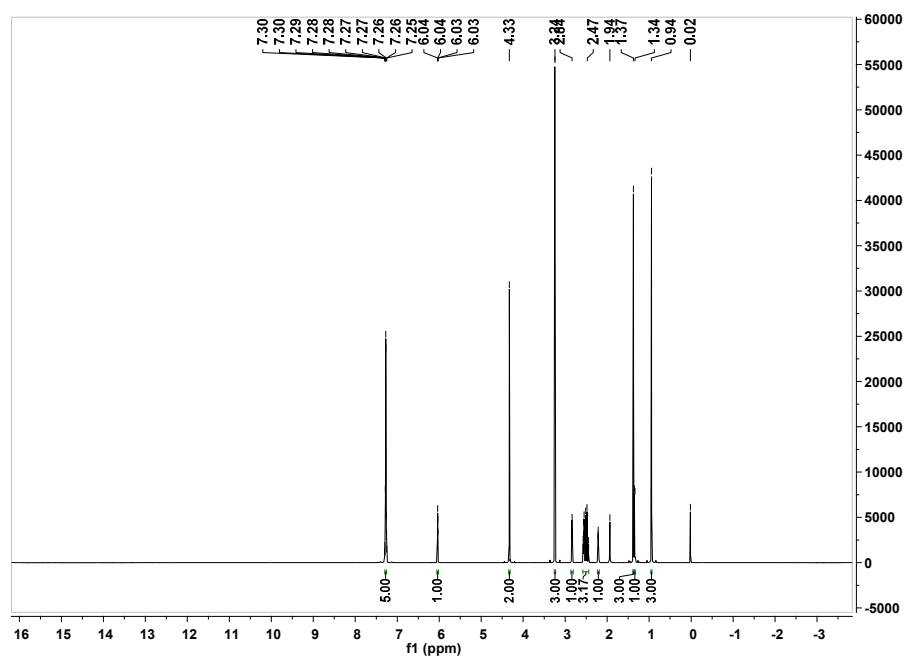Figure S42. <sup>1</sup>H-NMR spectrum of the target compound 6e in CDCl<sub>3</sub>.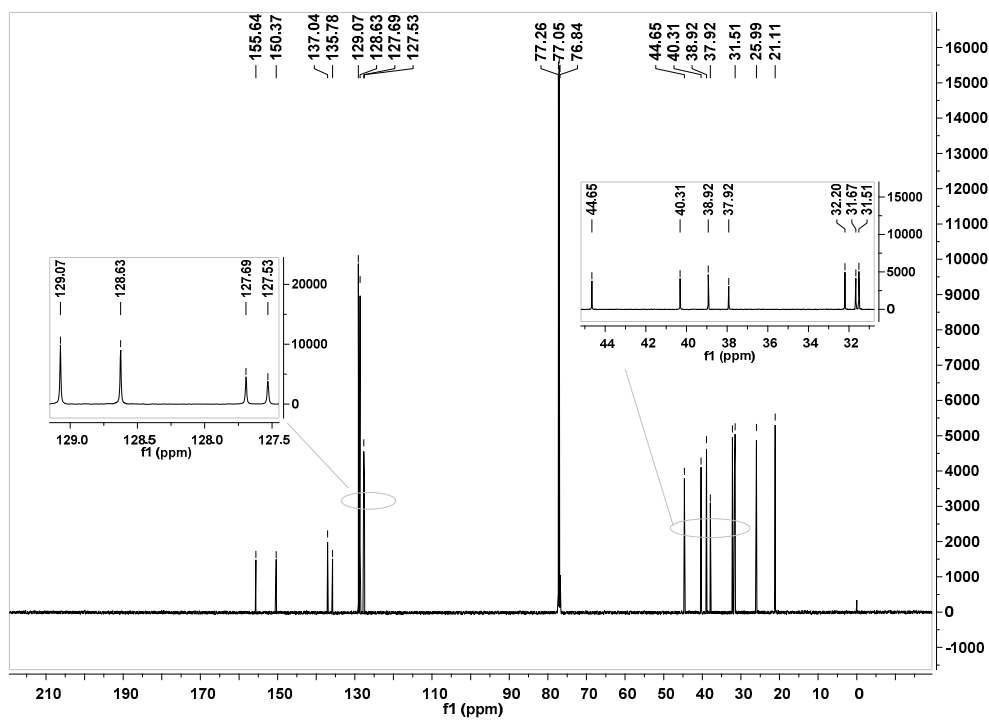Figure S43. <sup>13</sup>C-NMR spectrum of the target compound 6e in CDCl<sub>3</sub>.

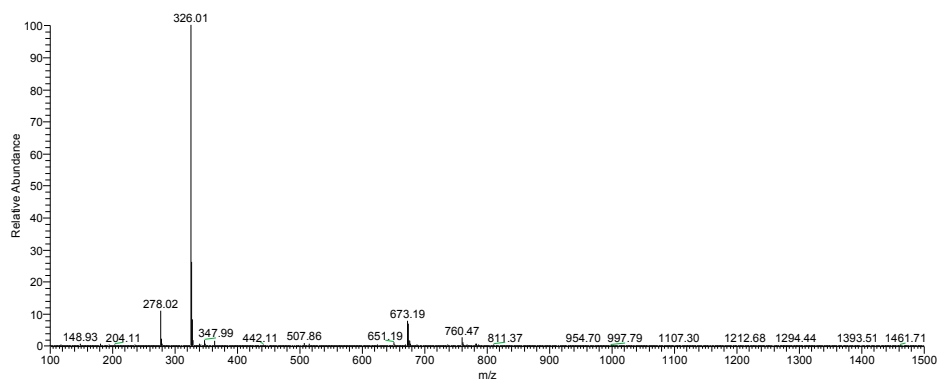

Figure S44. ESI-MS spectrum of the target compound 6e.

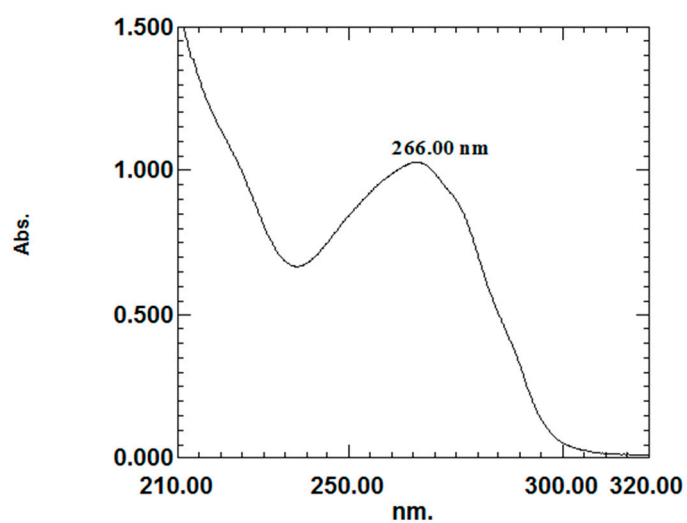

Figure S45. UV-vis spectrum of the target compound 6f in cyclohexane.

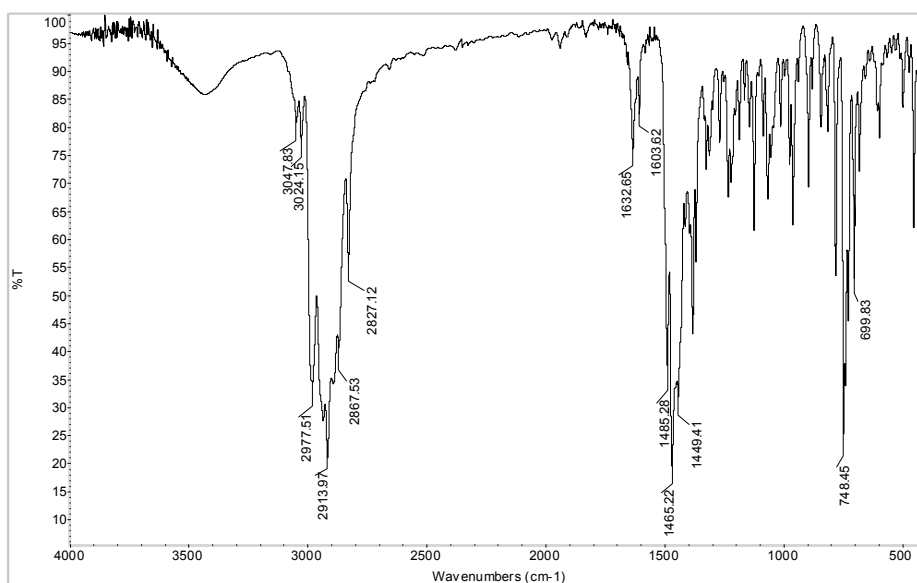

Figure S46. FTIR spectrum of the target compound 6f.

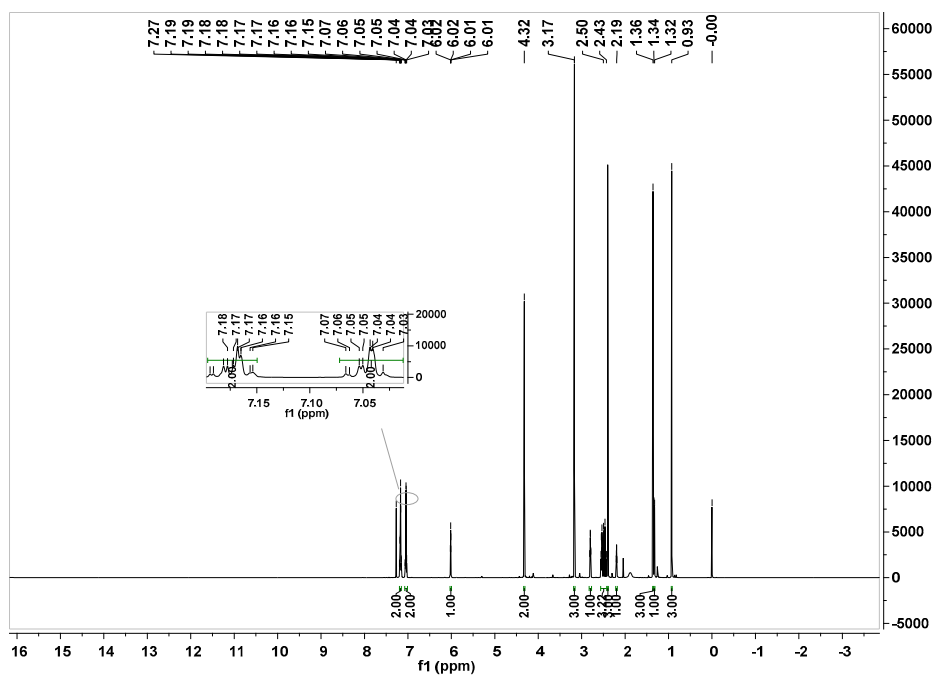

Figure S47.  $^1\text{H}$ -NMR spectrum of the target compound **6f** in  $\text{CDCl}_3$ .

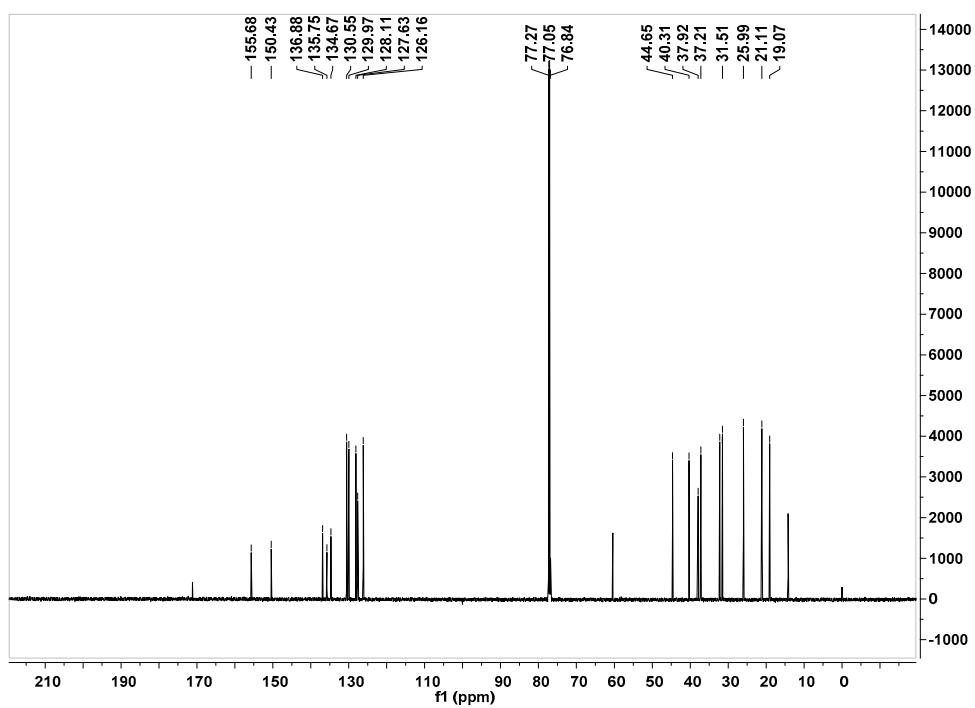

Figure S48.  $^{13}\text{C}$ -NMR spectrum of the target compound **6f** in  $\text{CDCl}_3$ .

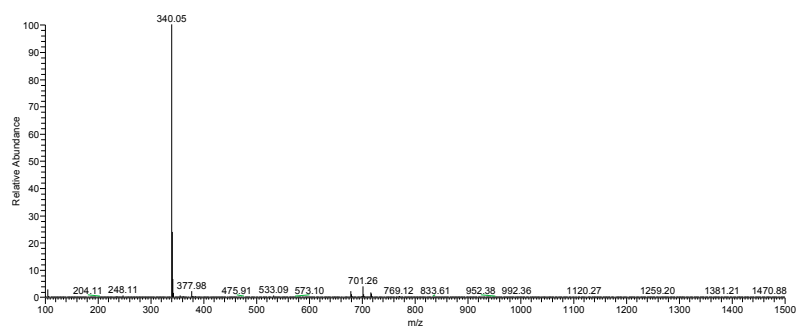

Figure S49. ESI-MS spectrum of the target compound 6f.

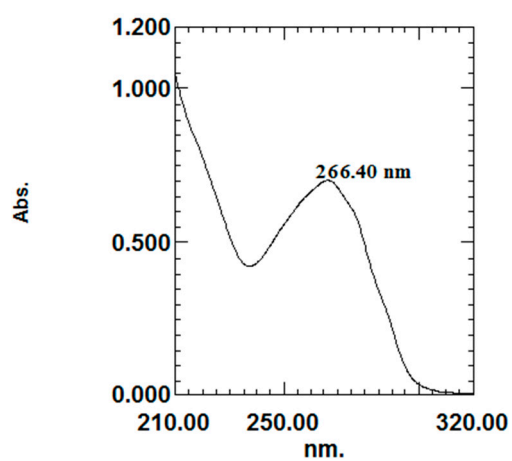

Figure S50. UV-vis spectrum of the target compound 6g in cyclohexane.

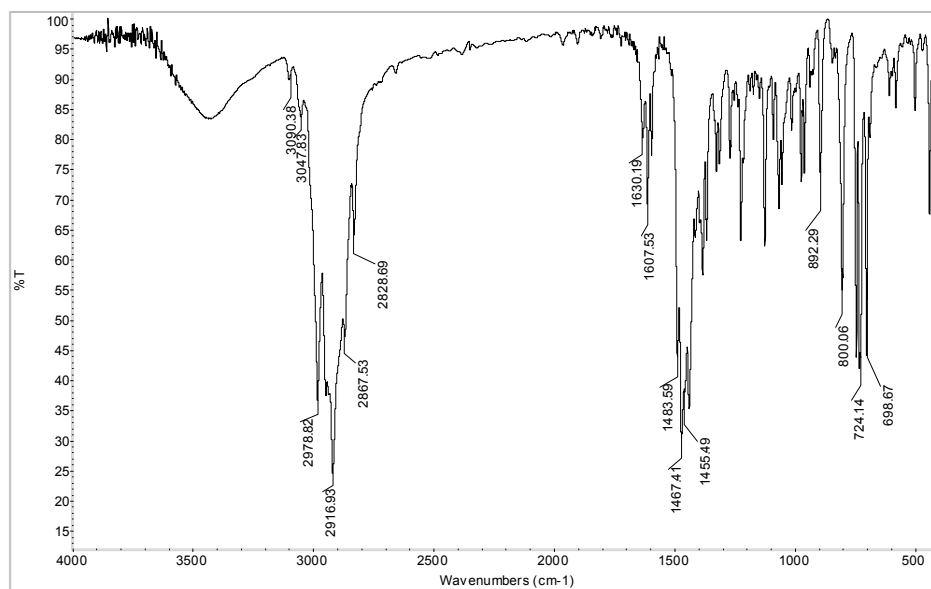

Figure S51. FTIR spectrum of the target compound 6g.

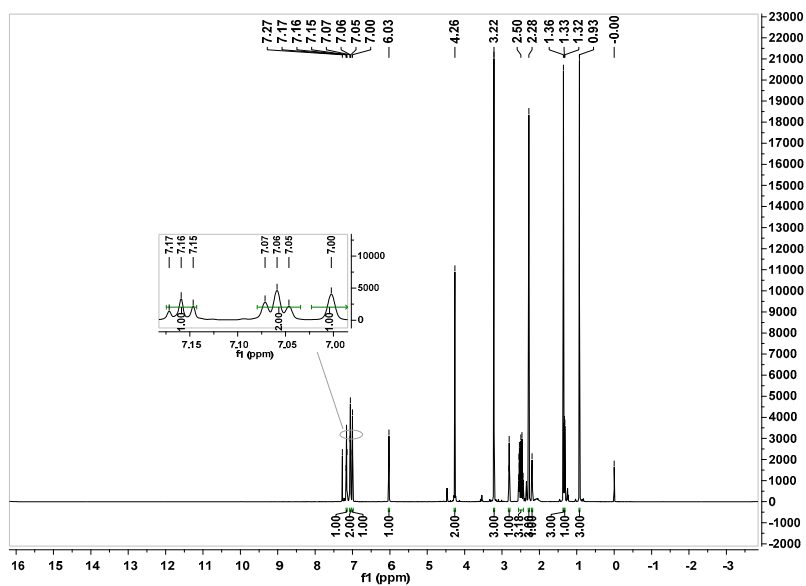

Figure S52.  $^1\text{H-NMR}$  spectrum of the target compound **6g** in  $\text{CDCl}_3$ .

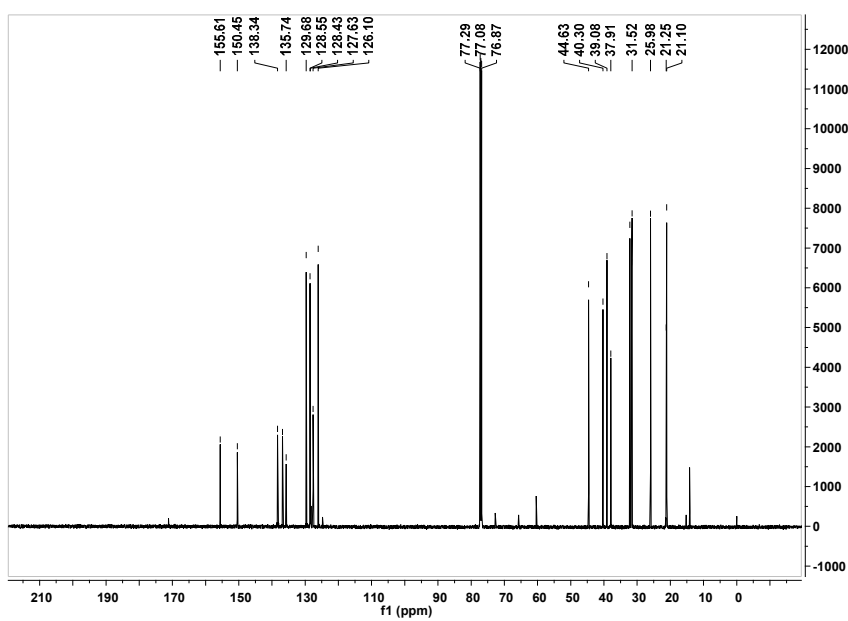

Figure S53.  $^{13}\text{C-NMR}$  spectrum of the target compound **6g** in  $\text{CDCl}_3$ .

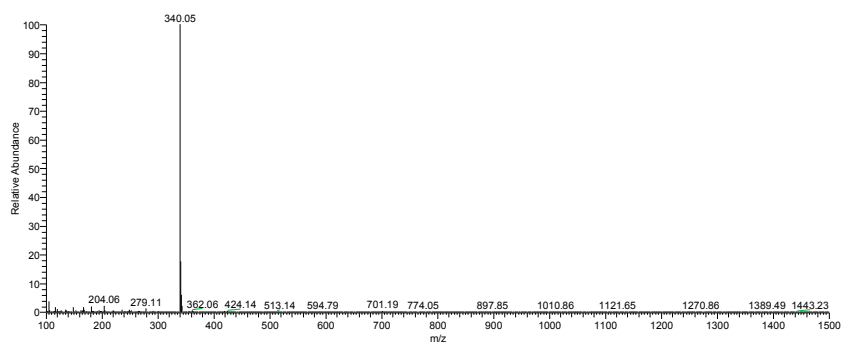

Figure S54. ESI-MS spectrum of the target compound **6g**.

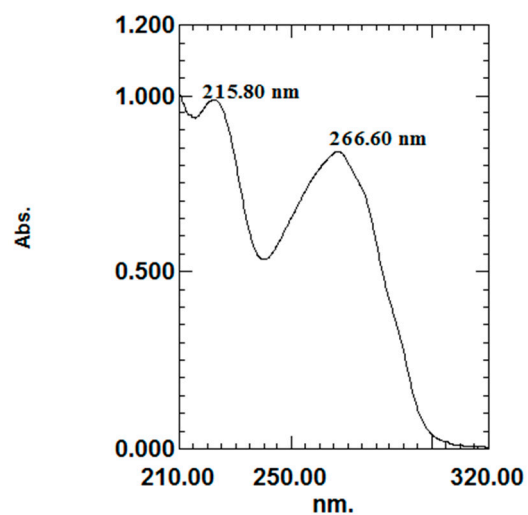

Figure S55. UV-vis spectrum of the target compound **6h** in cyclohexane.

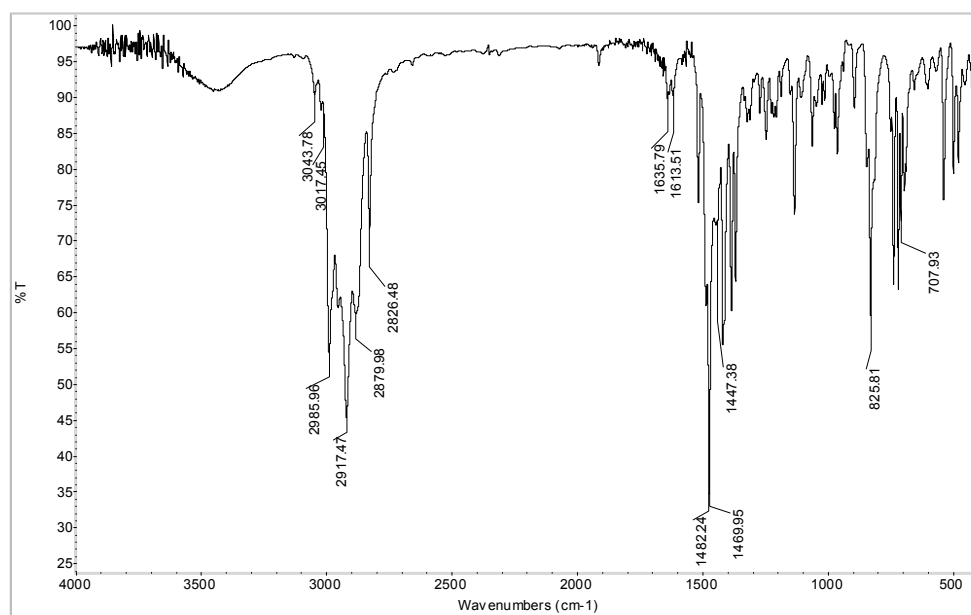

Figure S56. FTIR spectrum of the target compound **6h**.



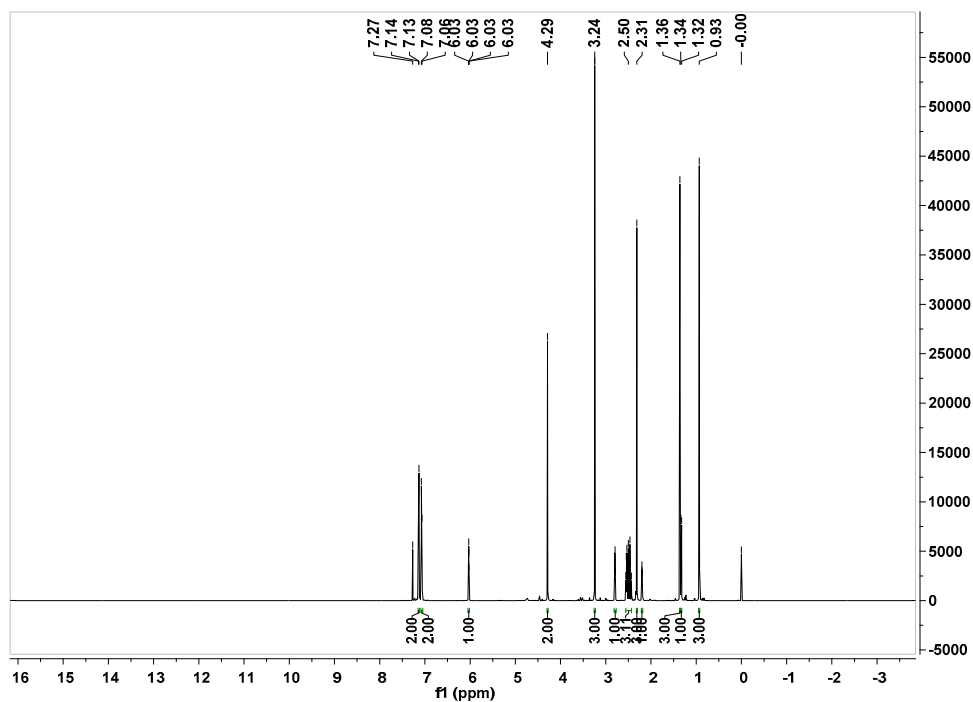Figure S57. <sup>1</sup>H-NMR spectrum of the target compound **6h** in CDCl<sub>3</sub>.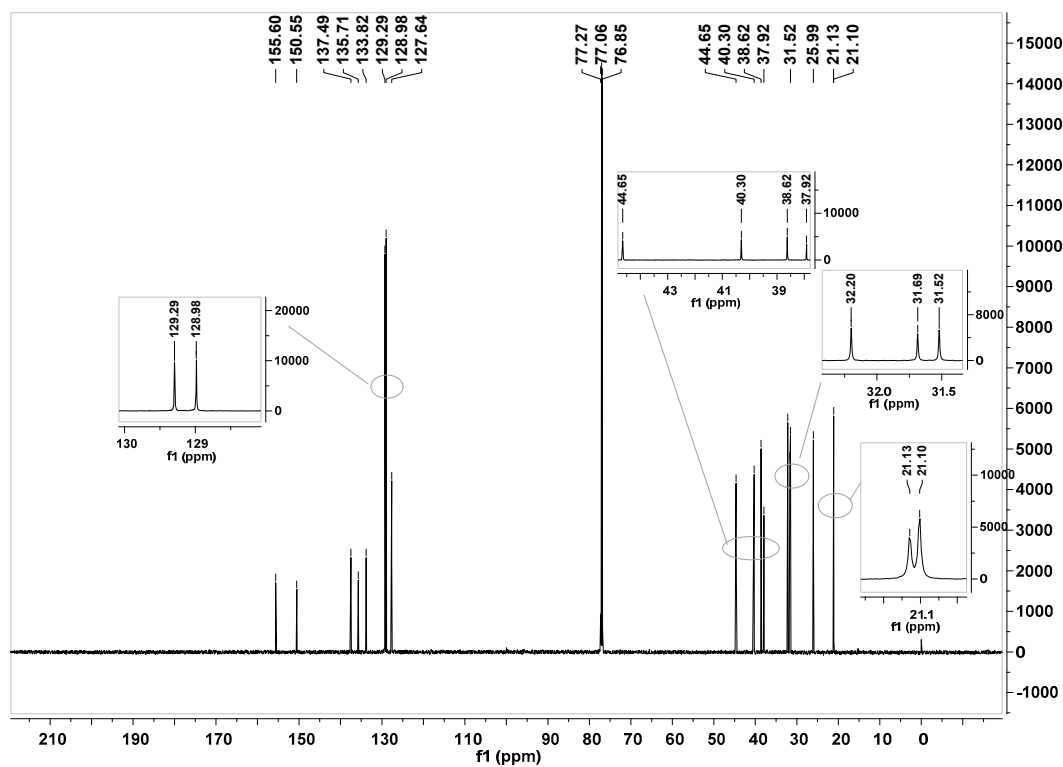Figure S58. <sup>13</sup>C-NMR spectrum of the target compound **6h** in CDCl<sub>3</sub>.

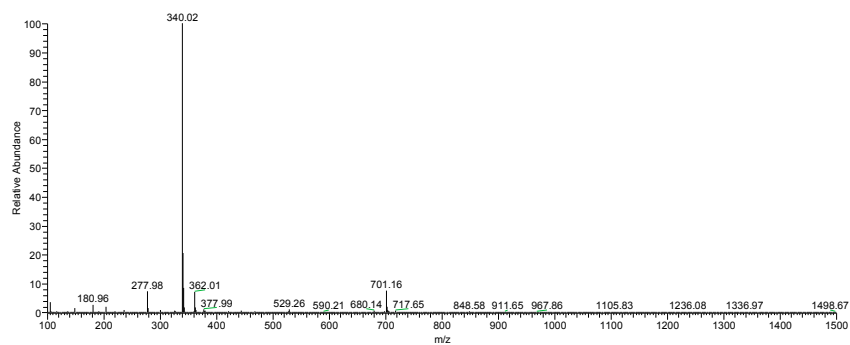

Figure S59. ESI-MS spectrum of the target compound **6h**.

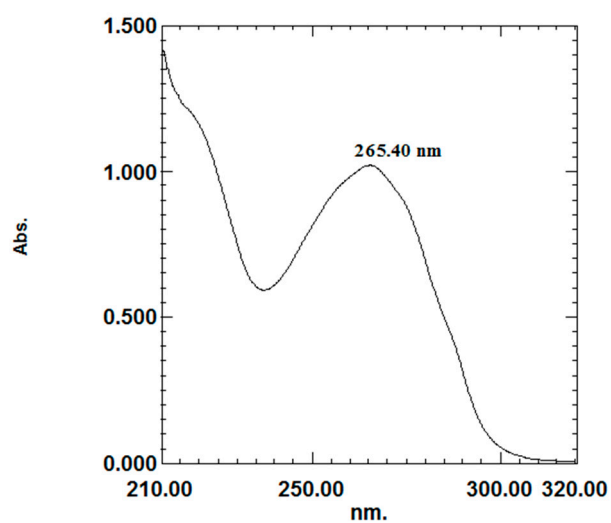

Figure S60. UV-vis spectrum of the target compound **6i** in cyclohexane.

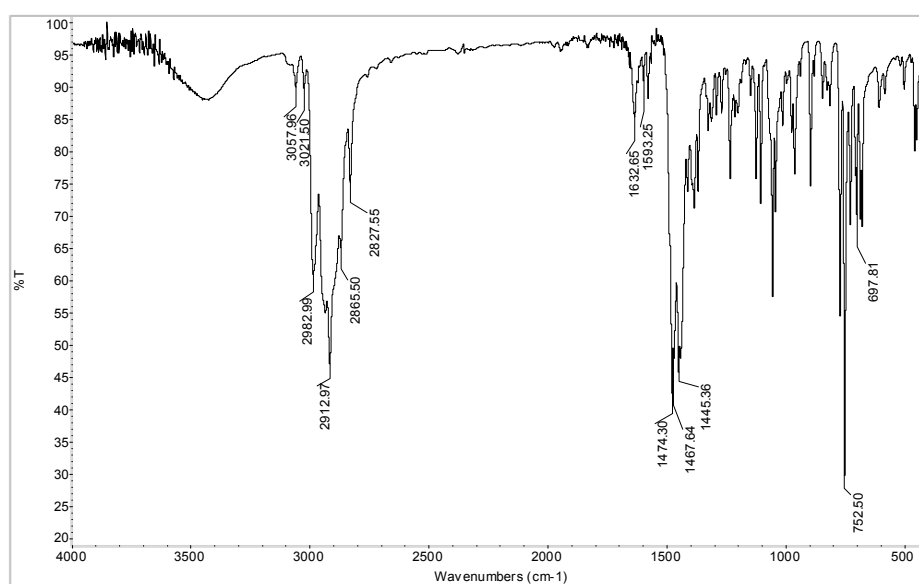

Figure S61. FTIR spectrum of the target compound **6i**.

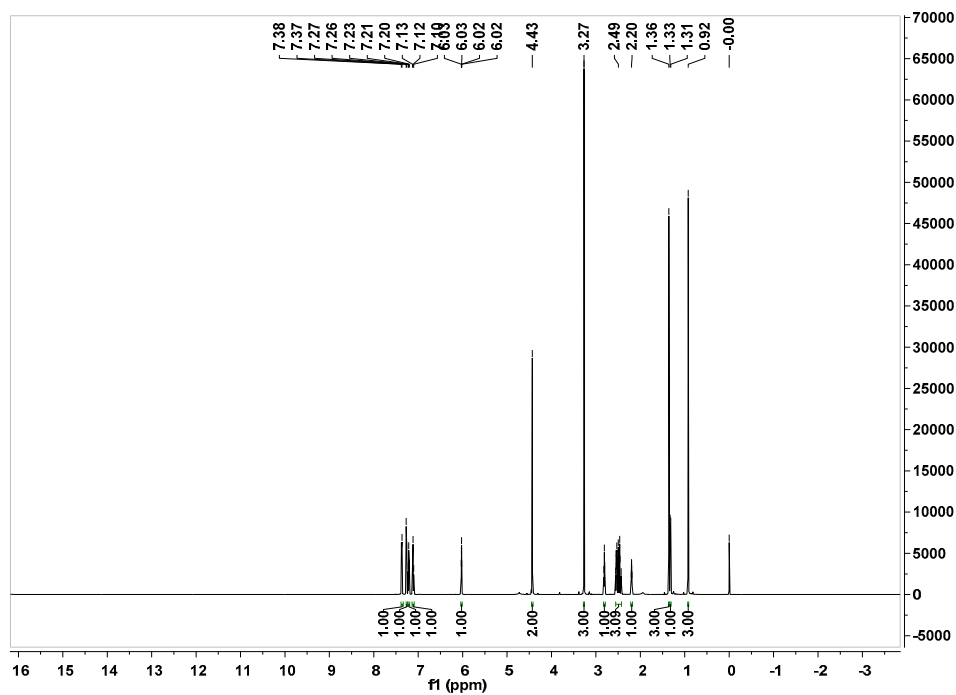

Figure S62. <sup>1</sup>H-NMR spectrum of the target compound **6i** in CDCl<sub>3</sub>.

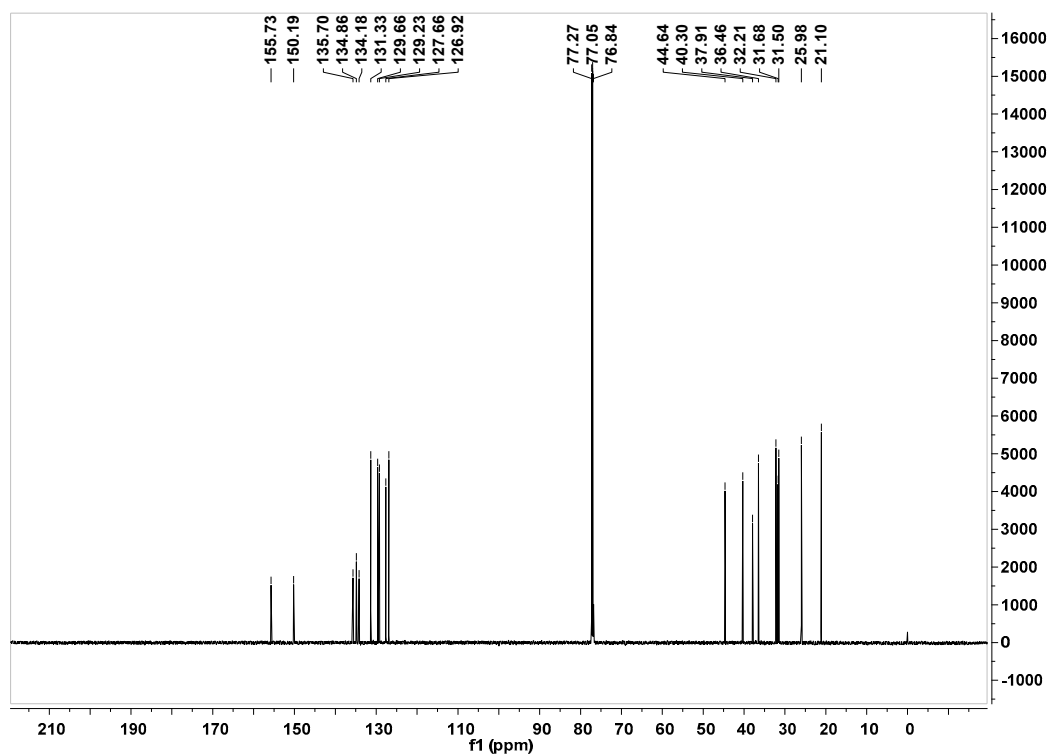

Figure S63. <sup>13</sup>C-NMR spectrum of the target compound **6i** in CDCl<sub>3</sub>.

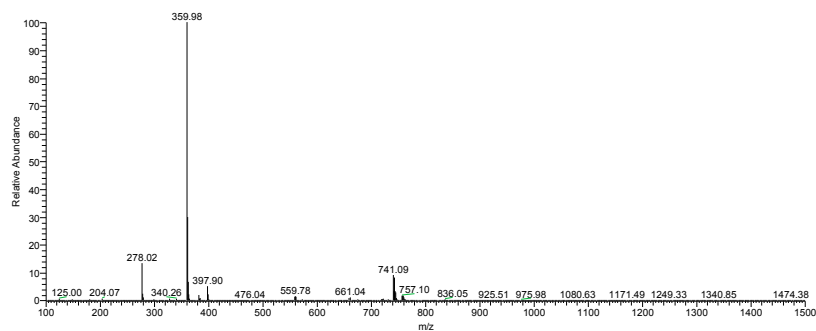

Figure S64. ESI-MS spectrum of the target compound 6i.

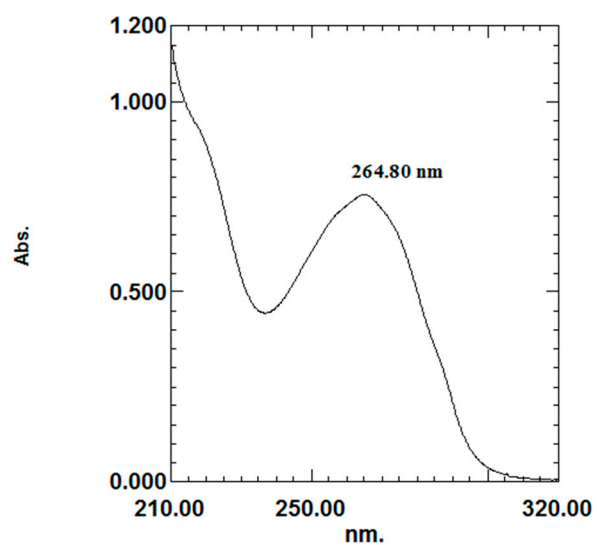

Figure S65. UV-vis spectrum of the target compound 6j in cyclohexane.

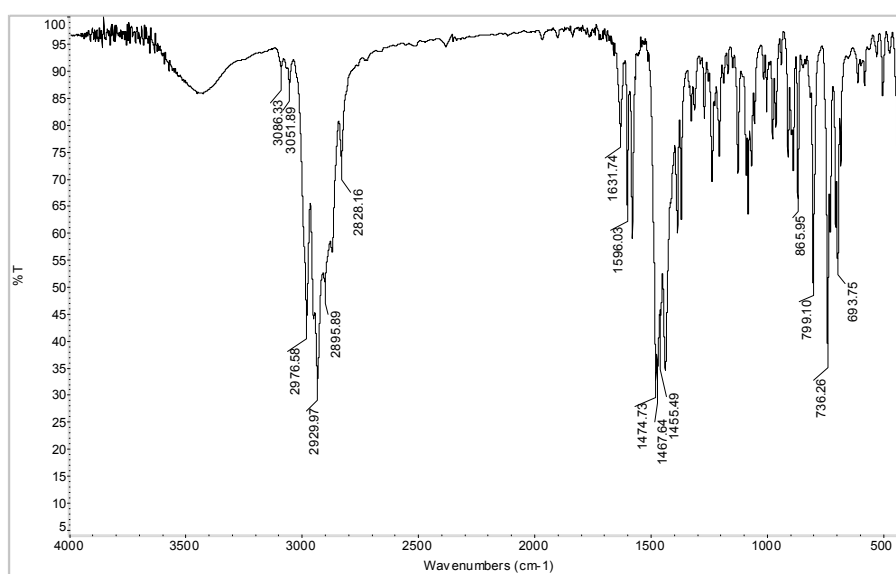

Figure S66. FTIR spectrum of the target compound 6j.

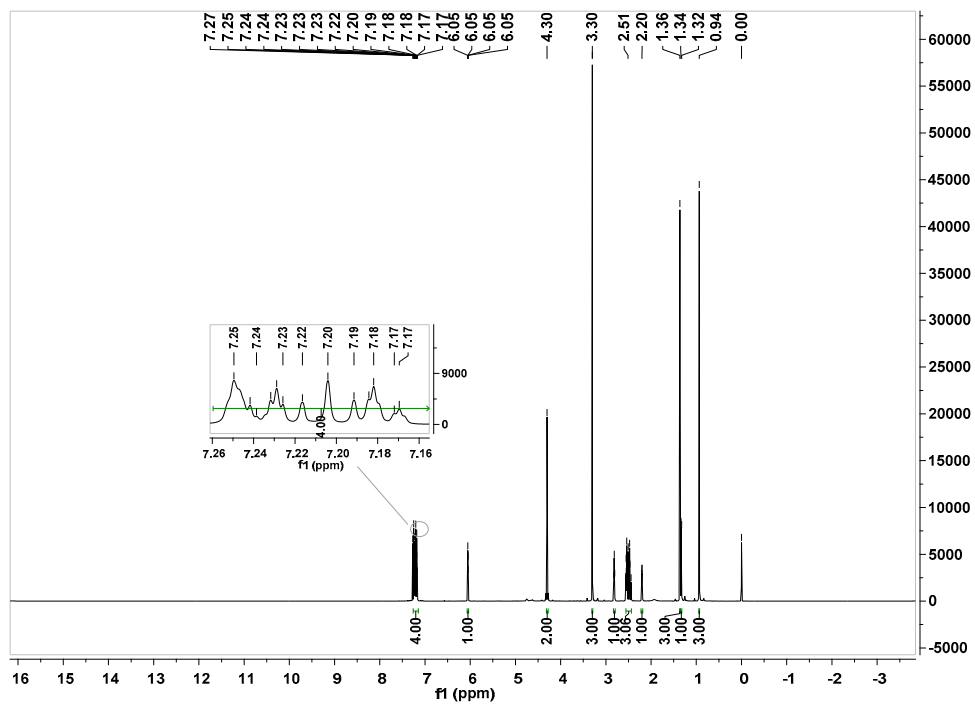Figure S67. <sup>1</sup>H-NMR spectrum of the target compound **6j** in CDCl<sub>3</sub>.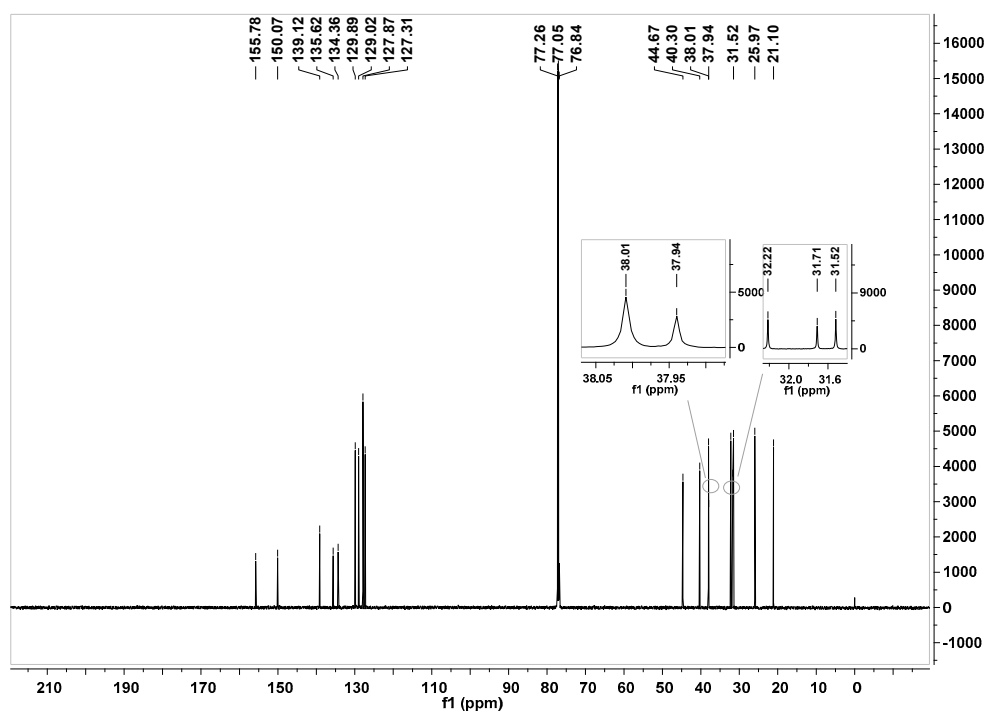Figure S68. <sup>13</sup>C-NMR spectrum of the target compound **6j** in CDCl<sub>3</sub>.

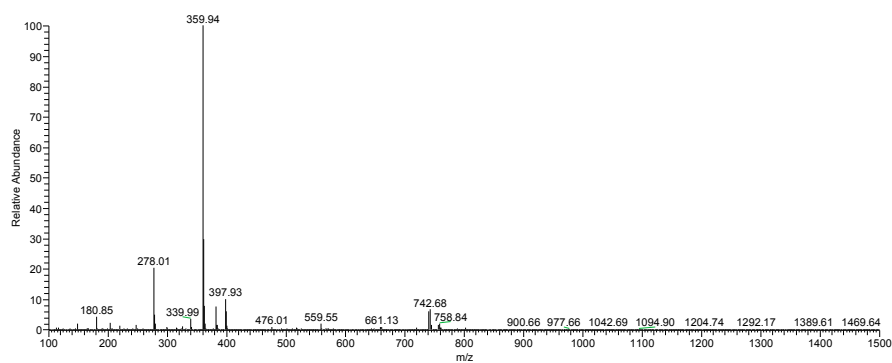

Figure S69. ESI-MS spectrum of the target compound 6j.

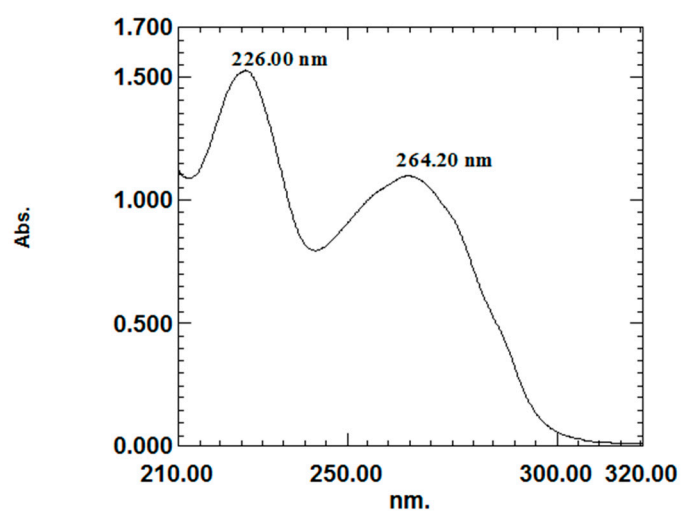

Figure S70. UV-vis spectrum of the target compound 6k in cyclohexane.

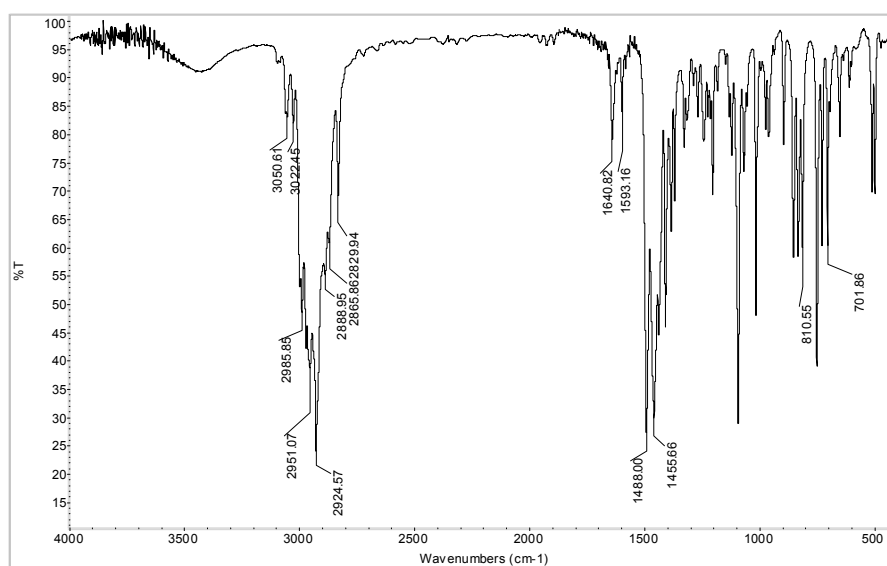

Figure S71. FTIR spectrum of the target compound 6k.

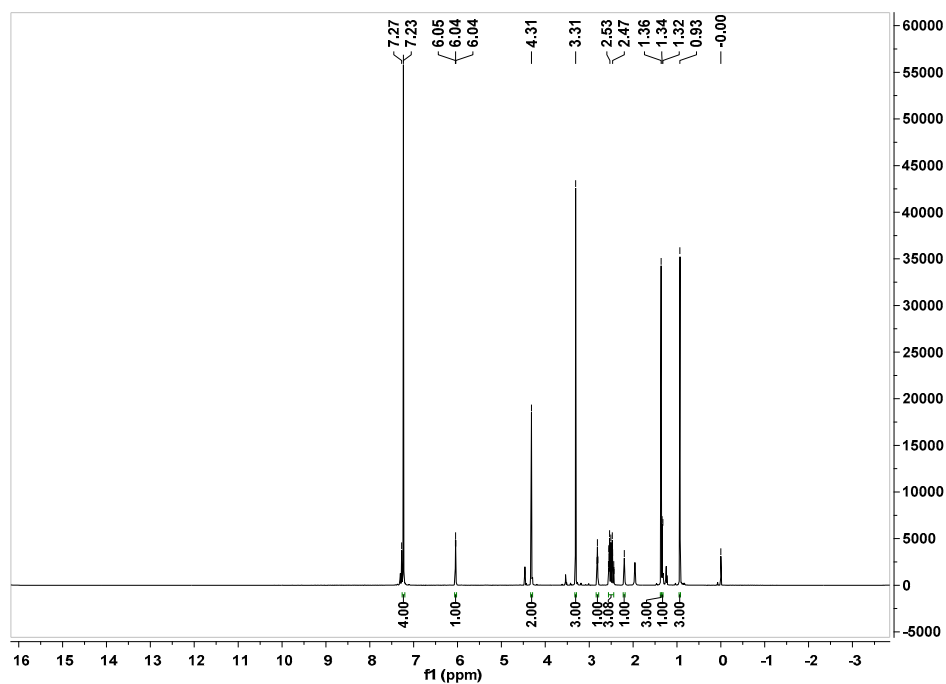Figure S72.  $^1\text{H}$ -NMR spectrum of the target compound **6k** in  $\text{CDCl}_3$ .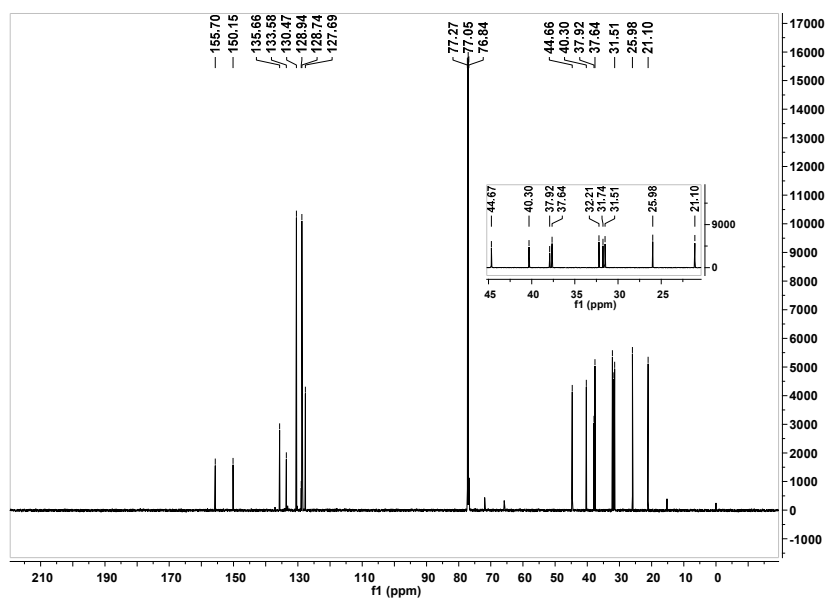Figure S73.  $^{13}\text{C}$ -NMR spectrum of the target compound **6k** in  $\text{CDCl}_3$ .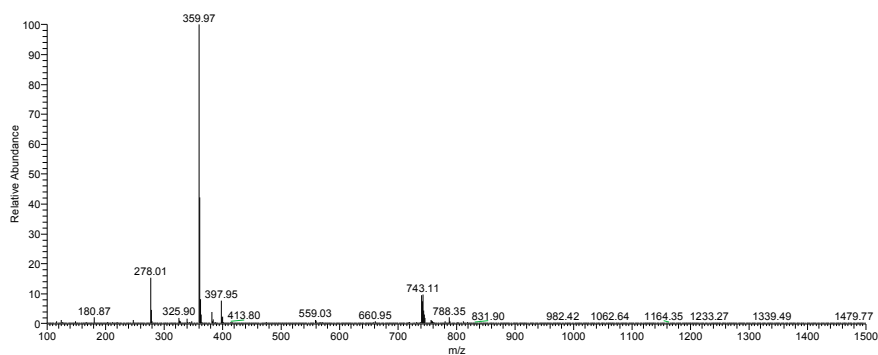

Figure S74. ESI-MS spectrum of the target compound 6k.

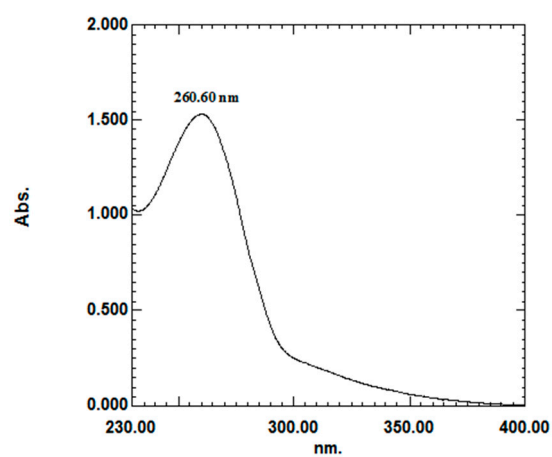

Figure S75. UV-vis spectrum of the target compound 6l in EtOH.

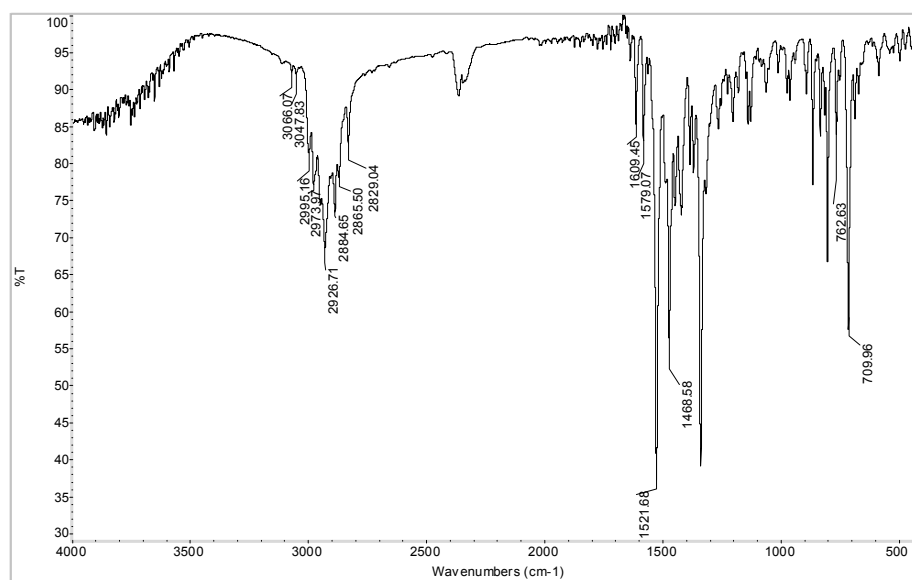

Figure S76. FTIR spectrum of the target compound 6l.



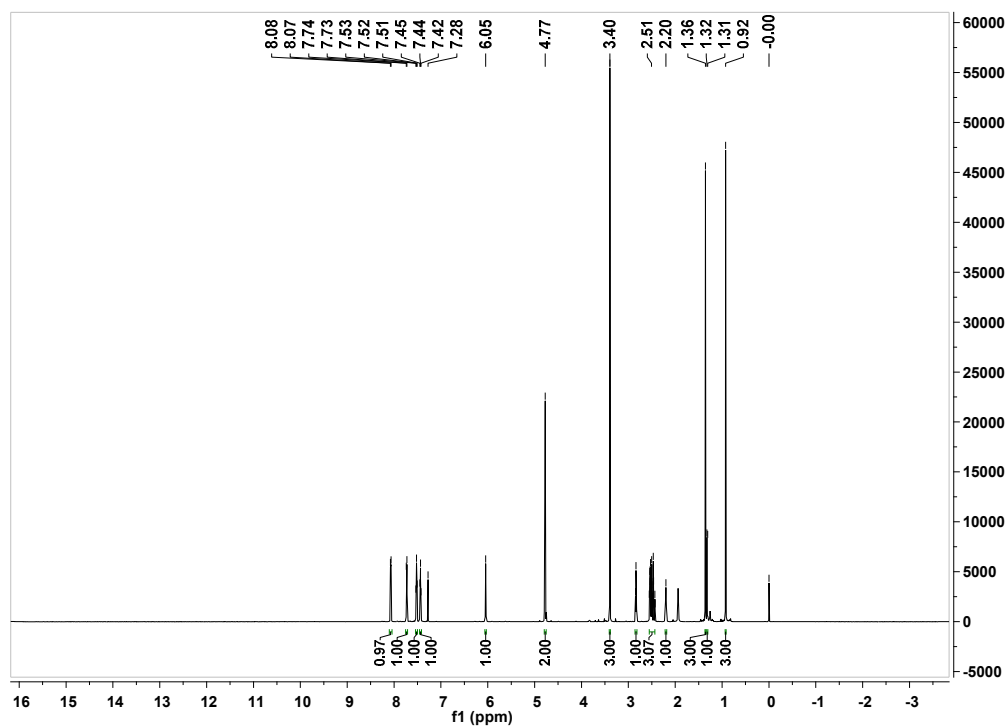Figure S77. <sup>1</sup>H-NMR spectrum of the target compound **6l** in CDCl<sub>3</sub>.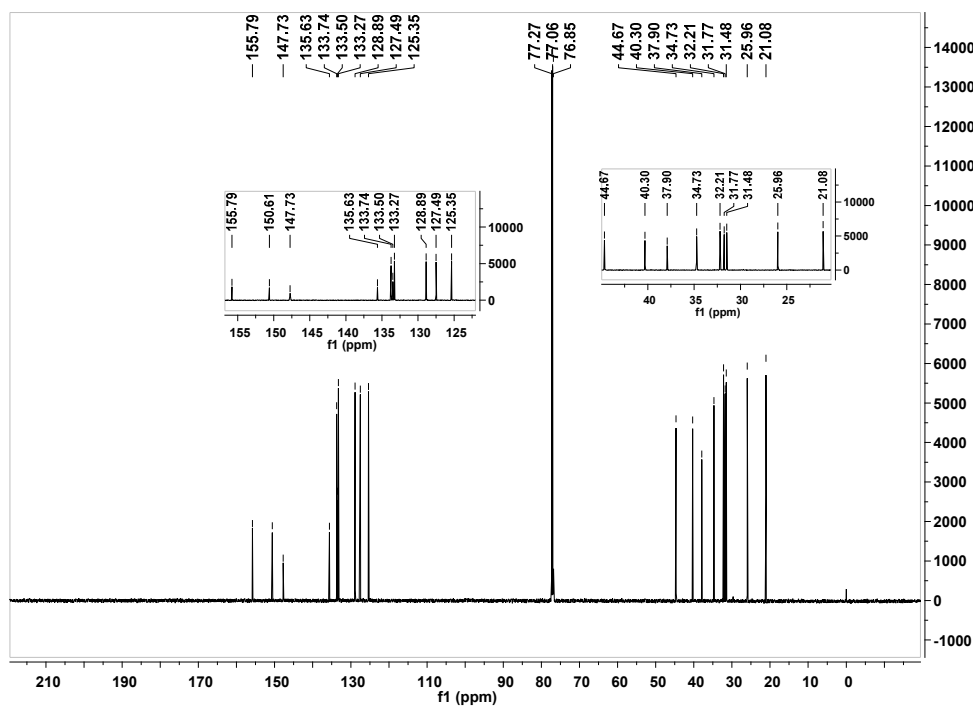Figure S78. <sup>13</sup>C-NMR spectrum of the target compound **6l** in CDCl<sub>3</sub>.

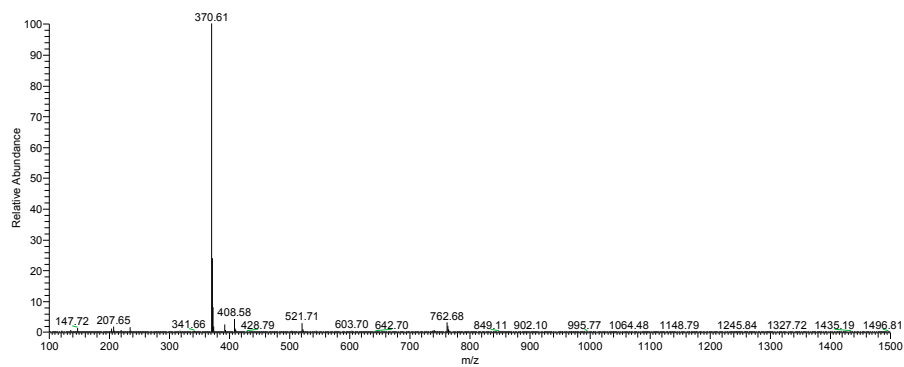

Figure S79. ESI-MS spectrum of the target compound 6l.

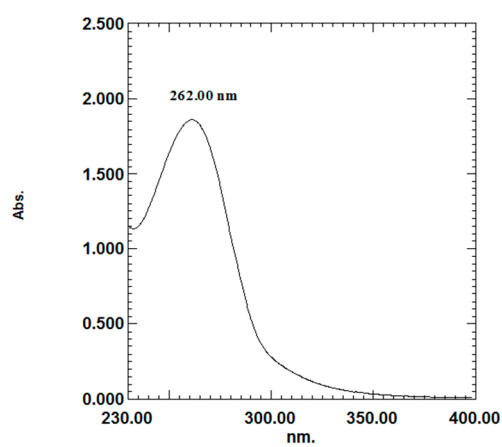

Figure S80. UV-vis spectrum of the target compound 6m in EtOH.

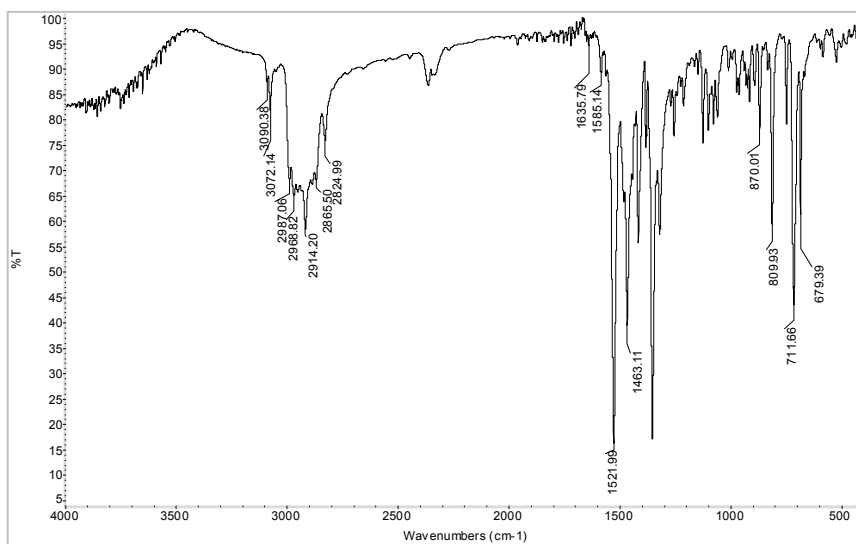

Figure S81. FTIR spectrum of the target compound 6m.

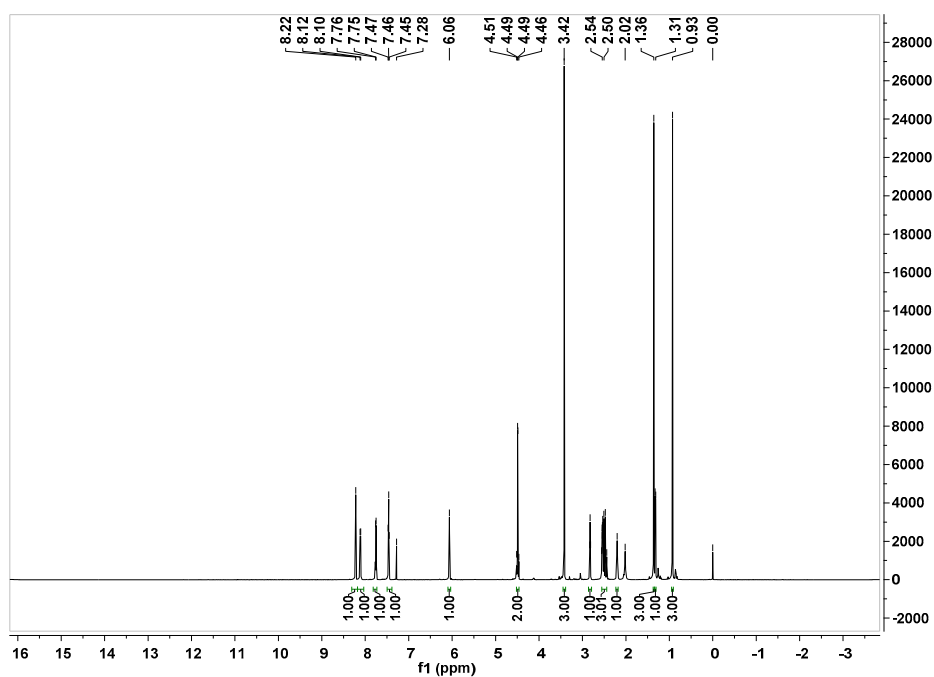Figure S82. <sup>1</sup>H-NMR spectrum of the target compound **6m** in CDCl<sub>3</sub>.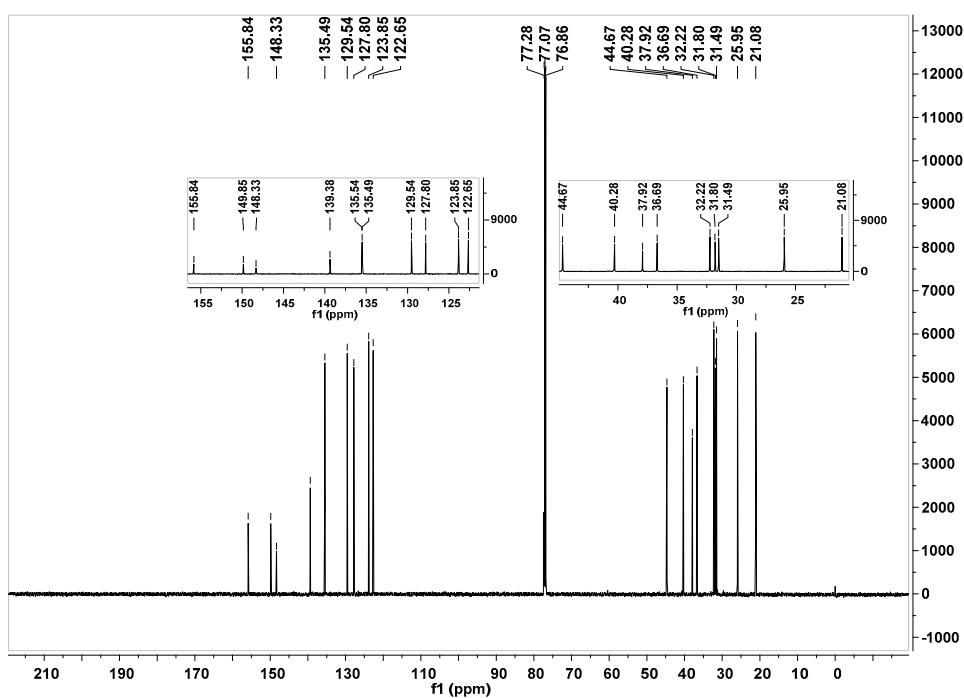Figure S83. <sup>13</sup>C-NMR spectrum of the target compound **6m** in CDCl<sub>3</sub>.

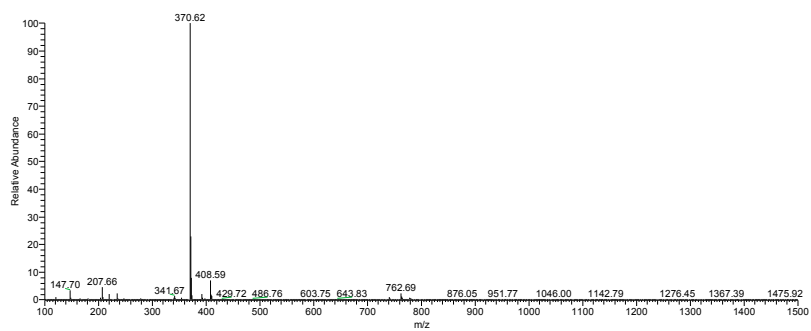

Figure S84. ESI-MS spectrum of the target compound 6m.

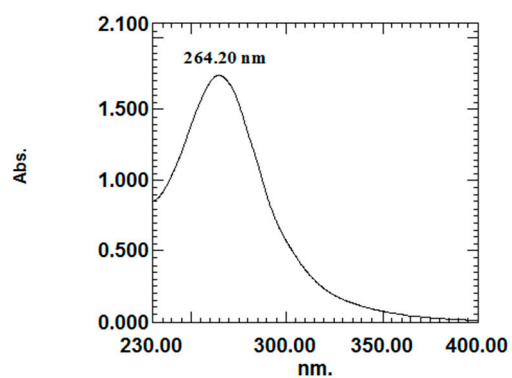

Figure S84. UV-vis spectrum of the target compound 6n in EtOH.

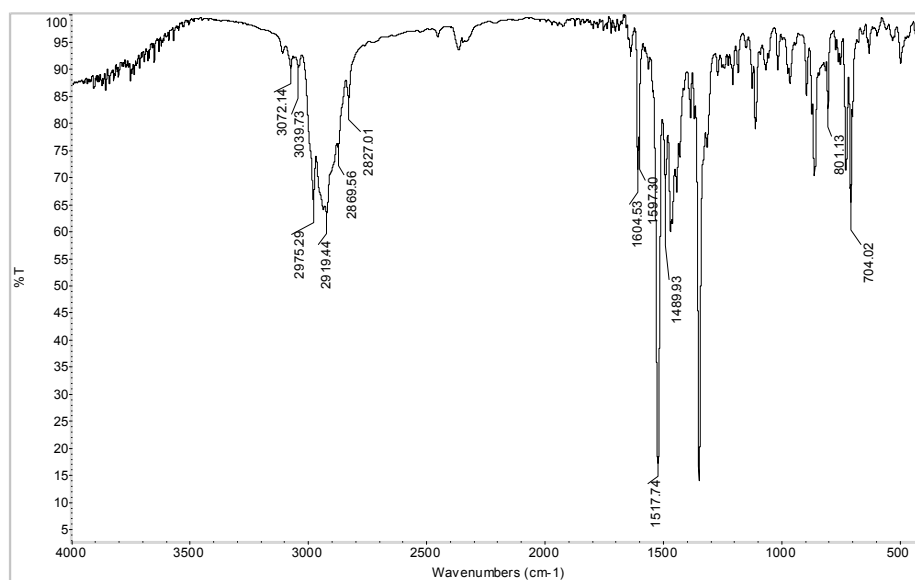

Figure S86. FTIR spectrum of the target compound 6n.

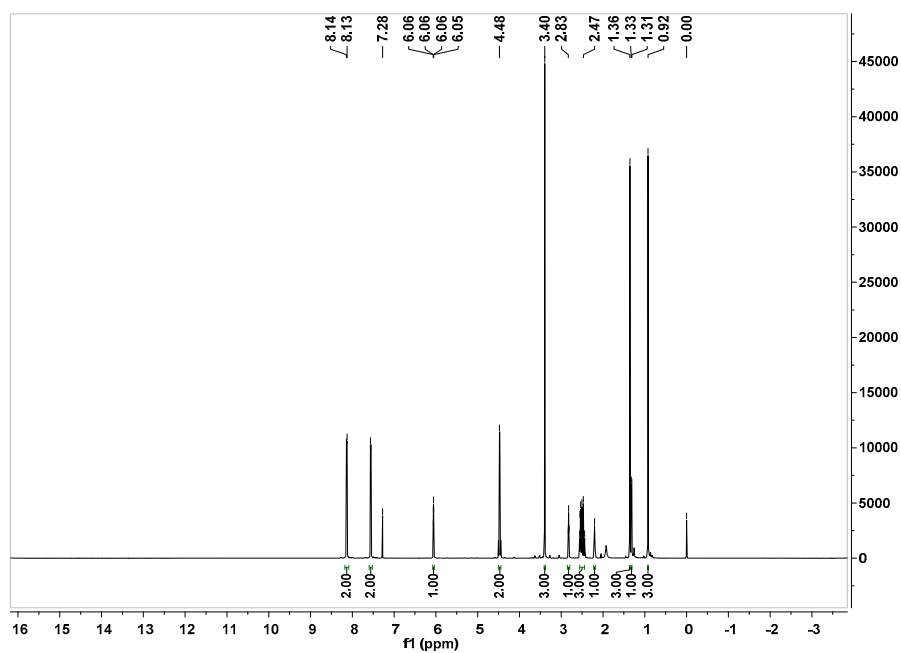Figure S87.  $^1\text{H}$ -NMR spectrum of the target compound **6n** in  $\text{CDCl}_3$ .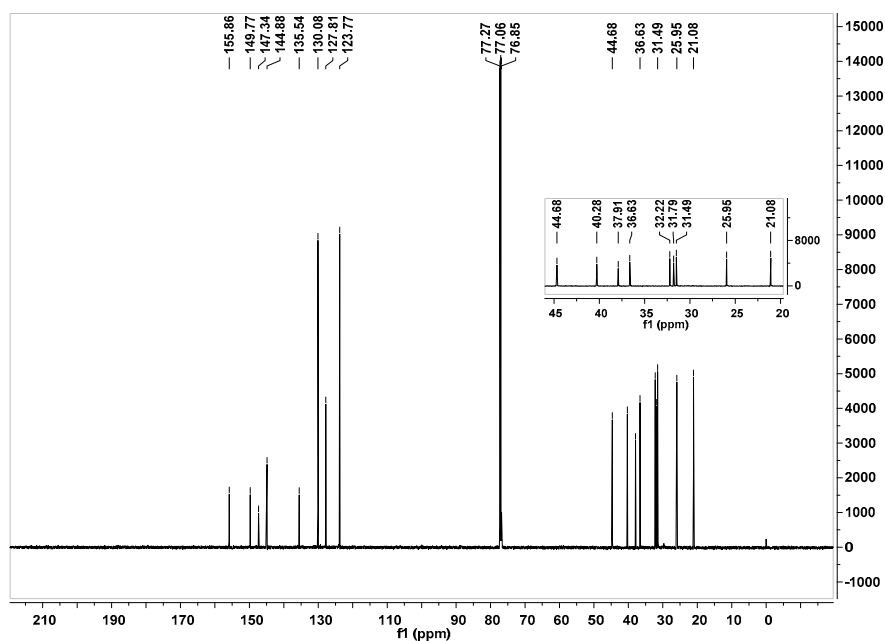Figure S88.  $^{13}\text{C}$ -NMR spectrum of the target compound **6n** in  $\text{CDCl}_3$ .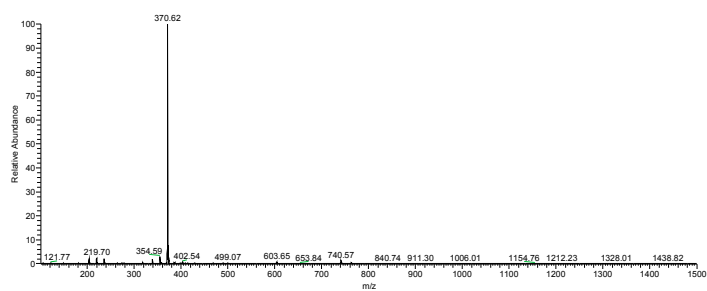Figure S89. ESI-MS spectrum of the target compound **6n**.
